# Supplementary material for: AutoEpiCollect, a Novel Machine Learning-Based GUI Software for Vaccine Design: Application to Pan-Cancer Vaccine Design Targeting PIK3CA Neoantigens
Source: MDPI journal article supplement (doi:10.3390/bioengineering11040322), 2024-03-27

# World - Class I Coverage

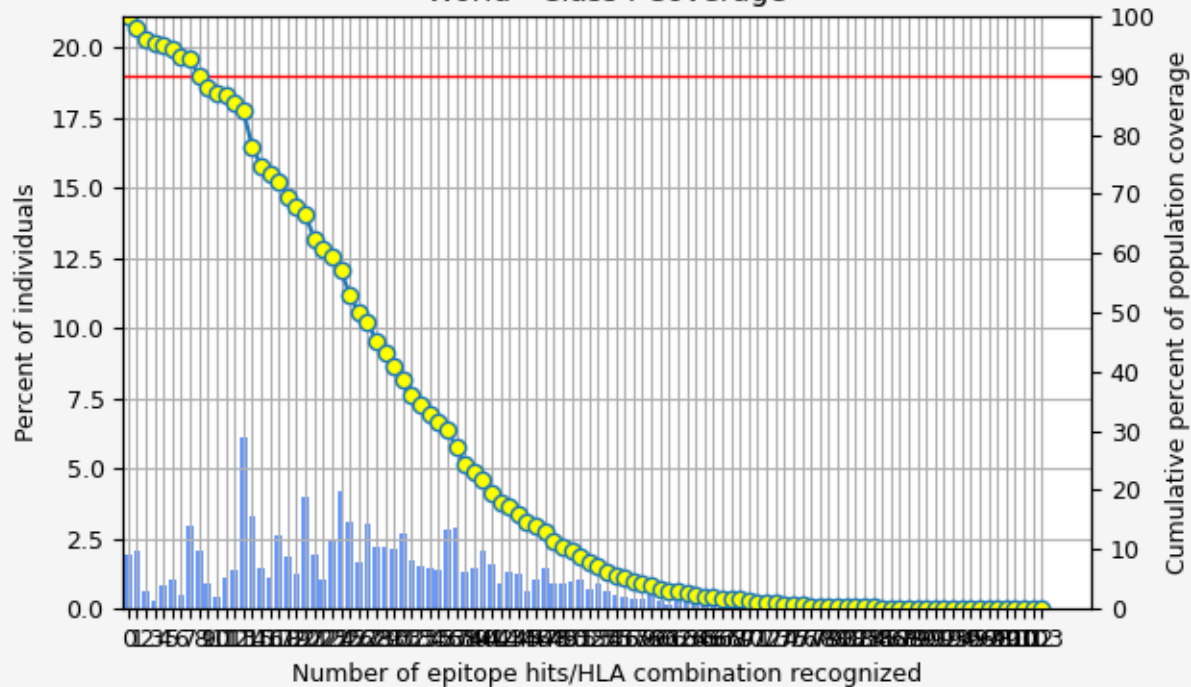

# Central Africa - Class I Coverage

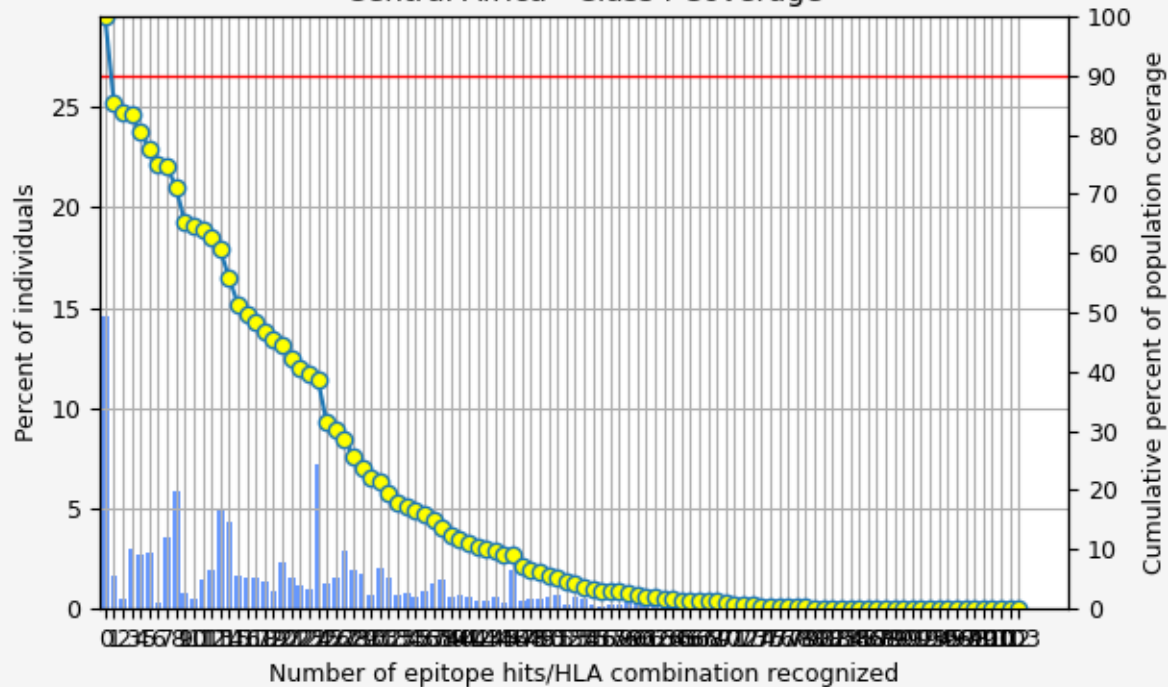

# Central America - Class I Coverage

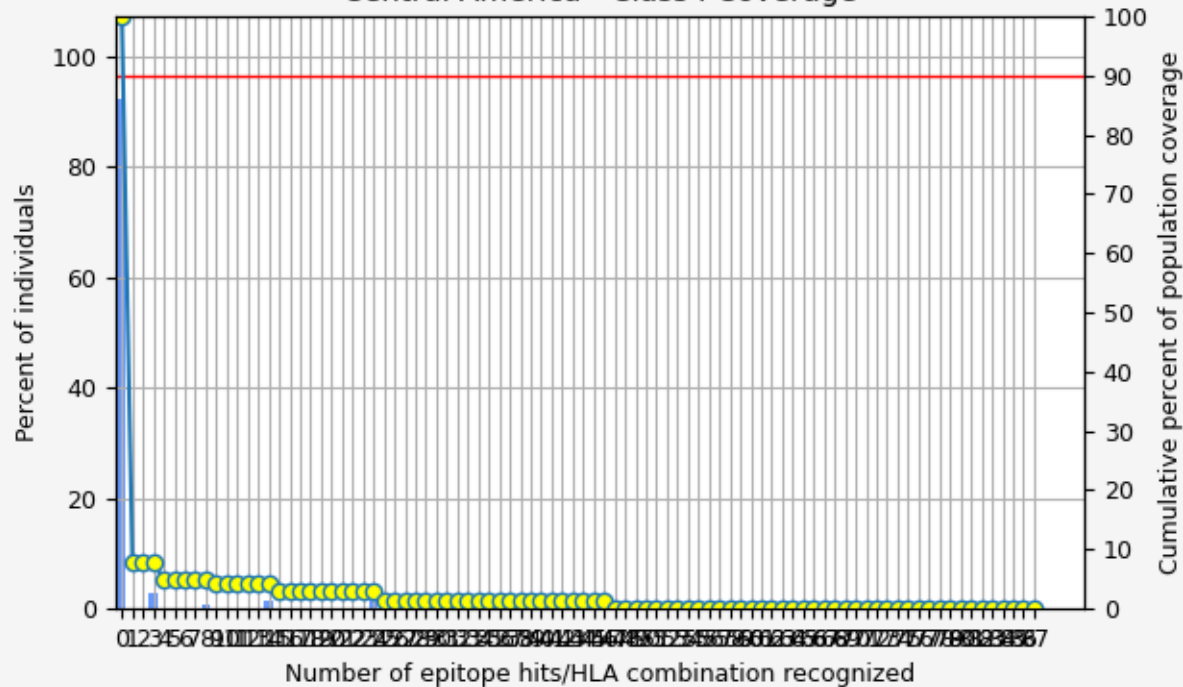

# East Africa - Class I Coverage

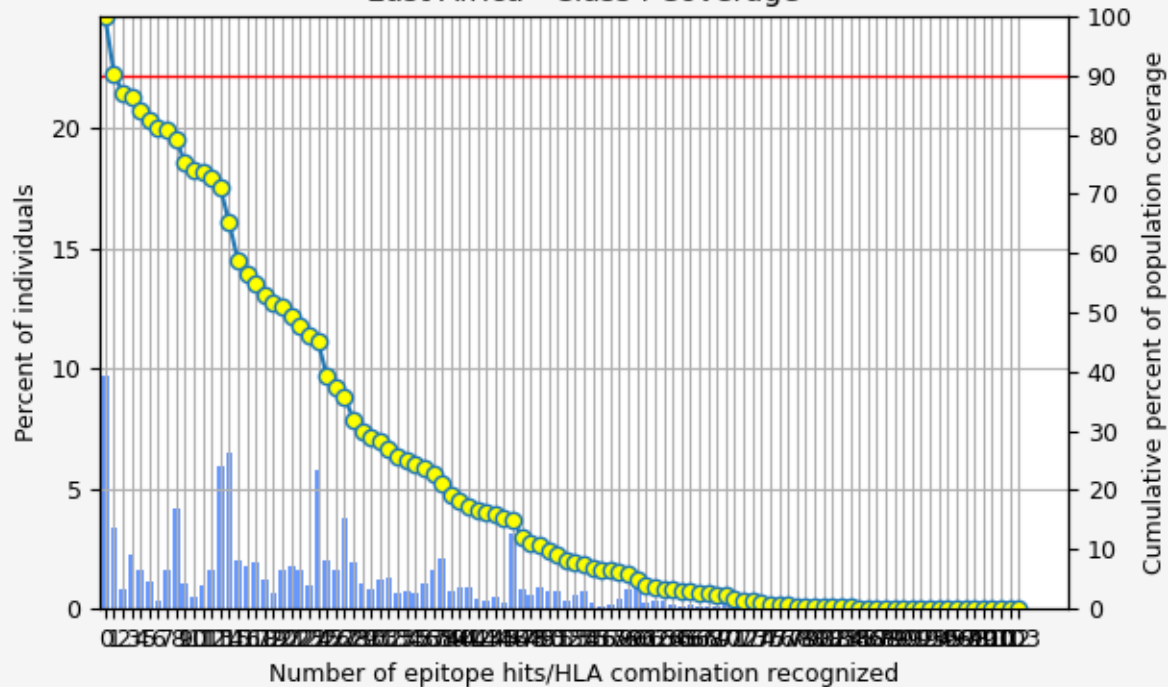

# East Asia - Class I Coverage

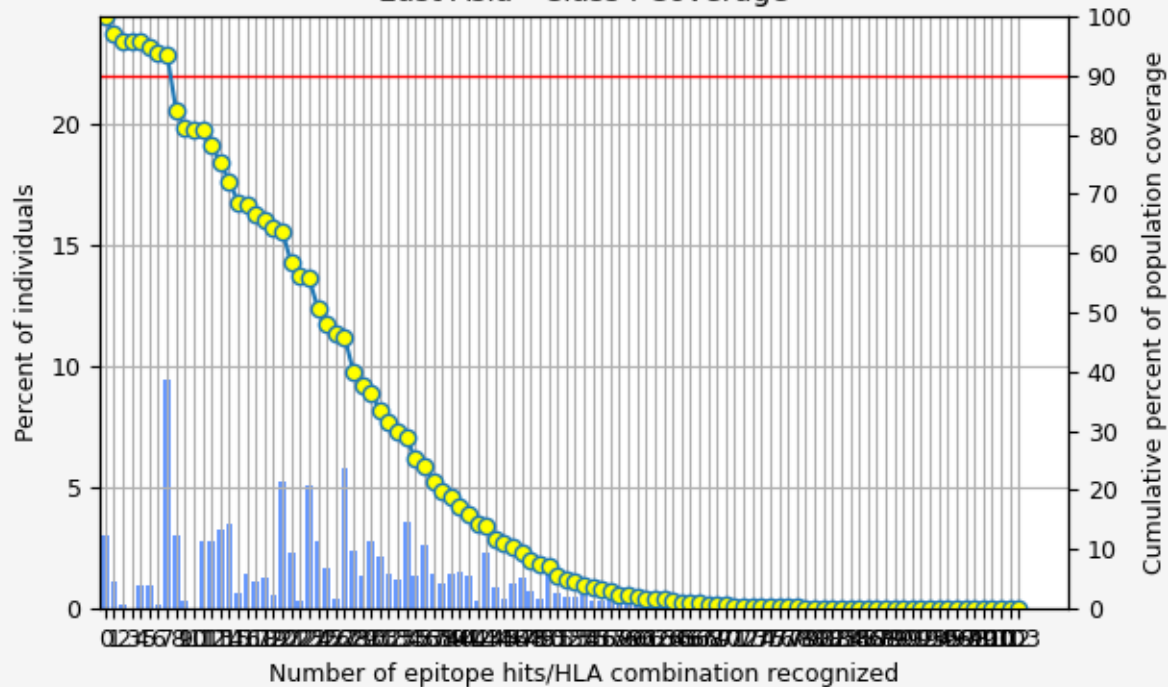

# Europe - Class I Coverage

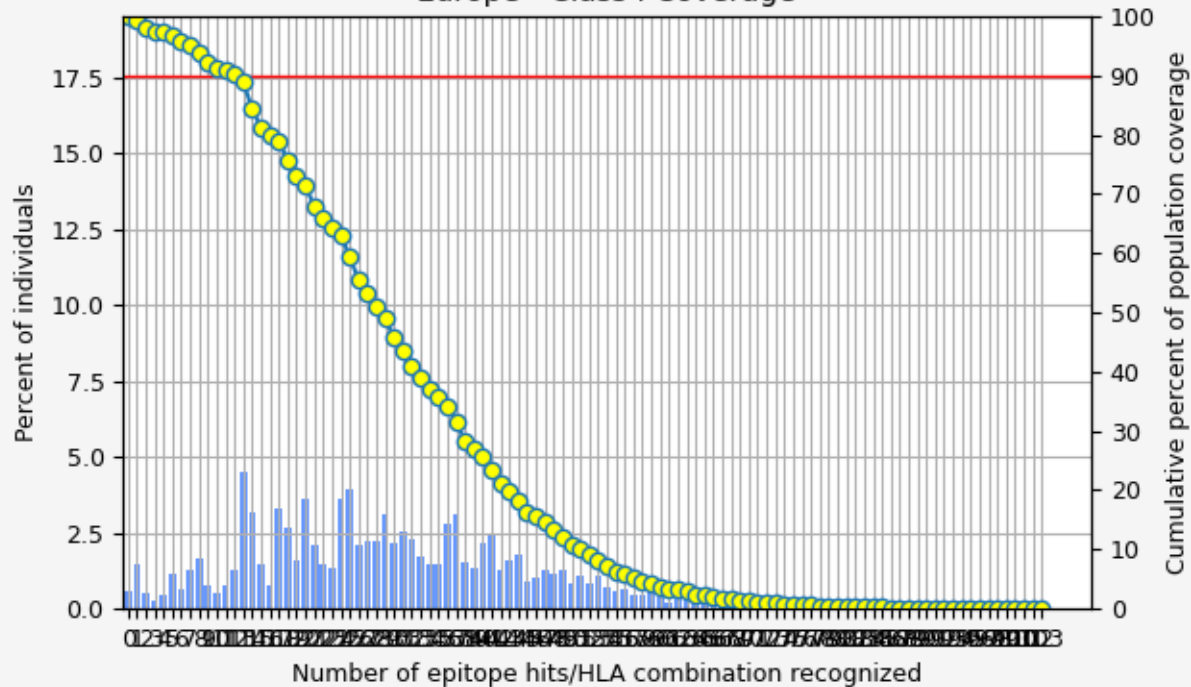

# North Africa - Class I Coverage

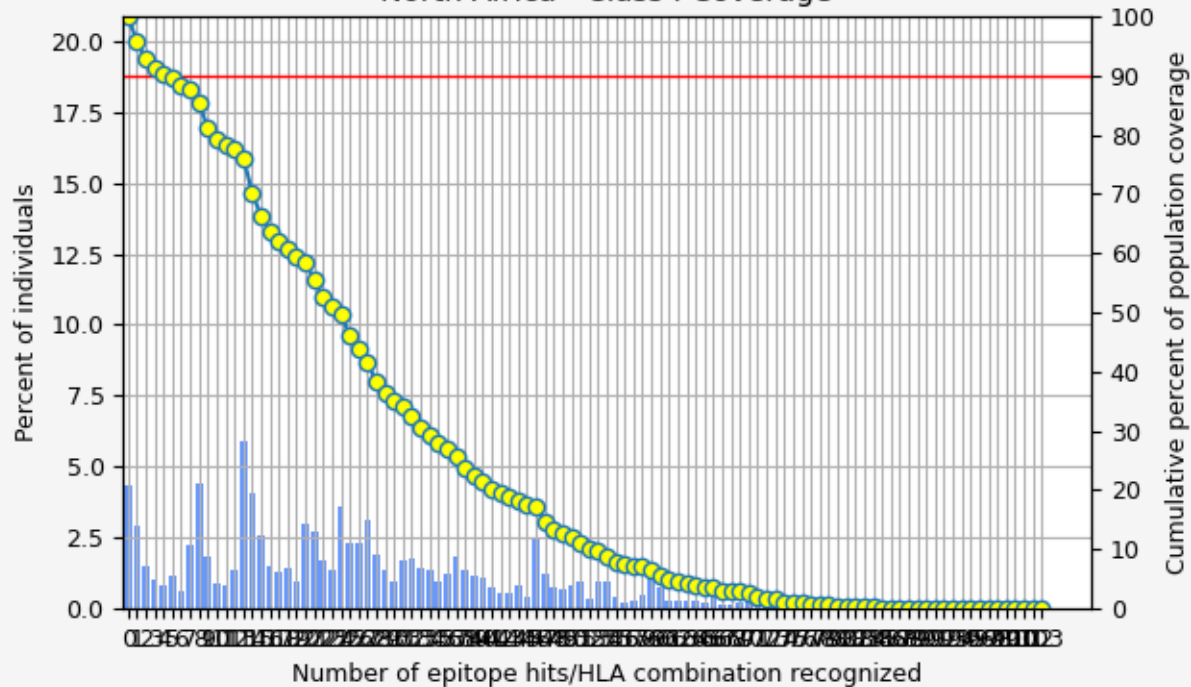

# North America - Class I Coverage

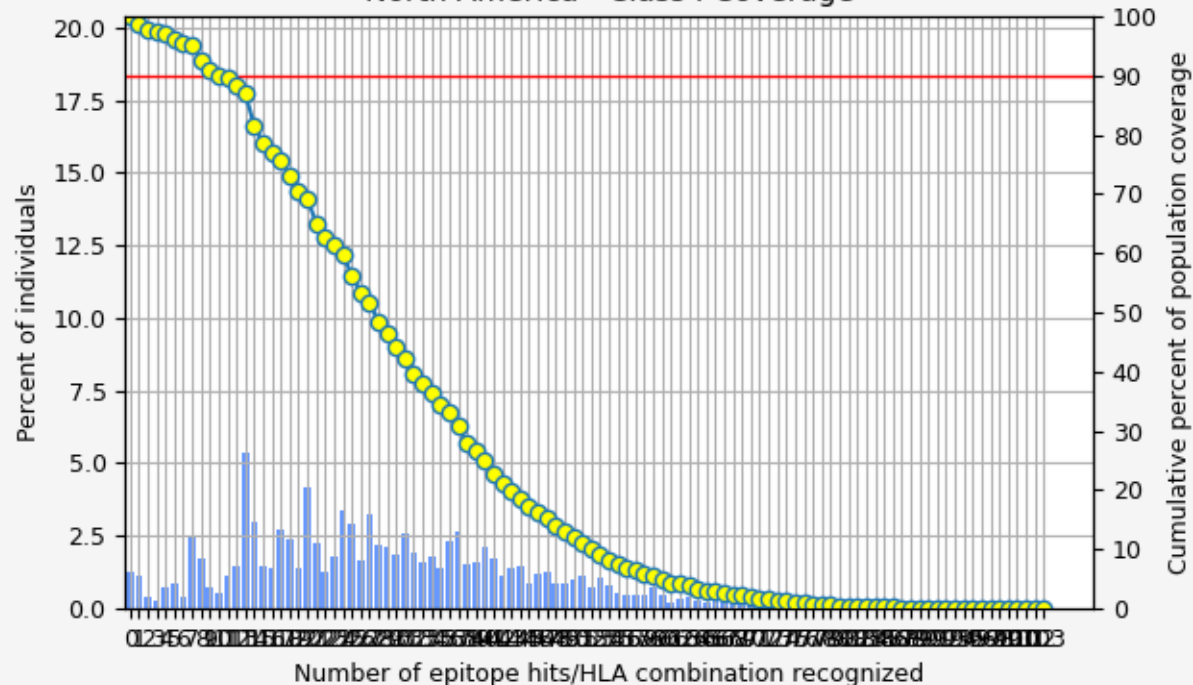



# Northeast Asia - Class I Coverage

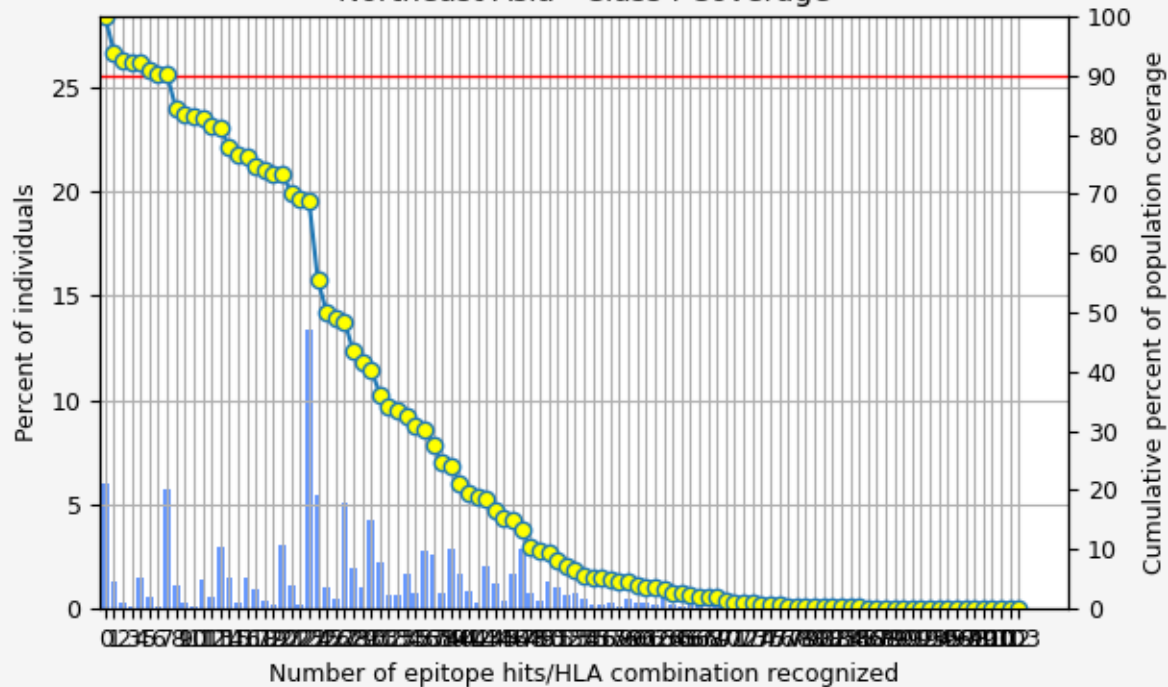

# Oceania - Class I Coverage

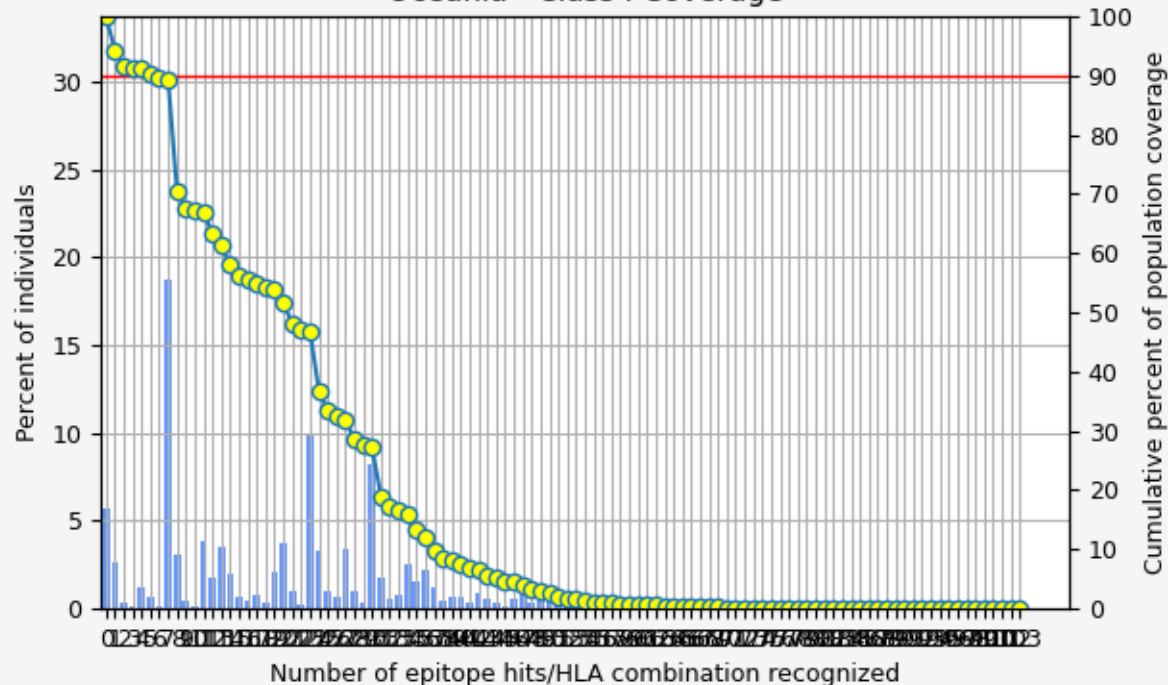

# South Africa - Class I Coverage

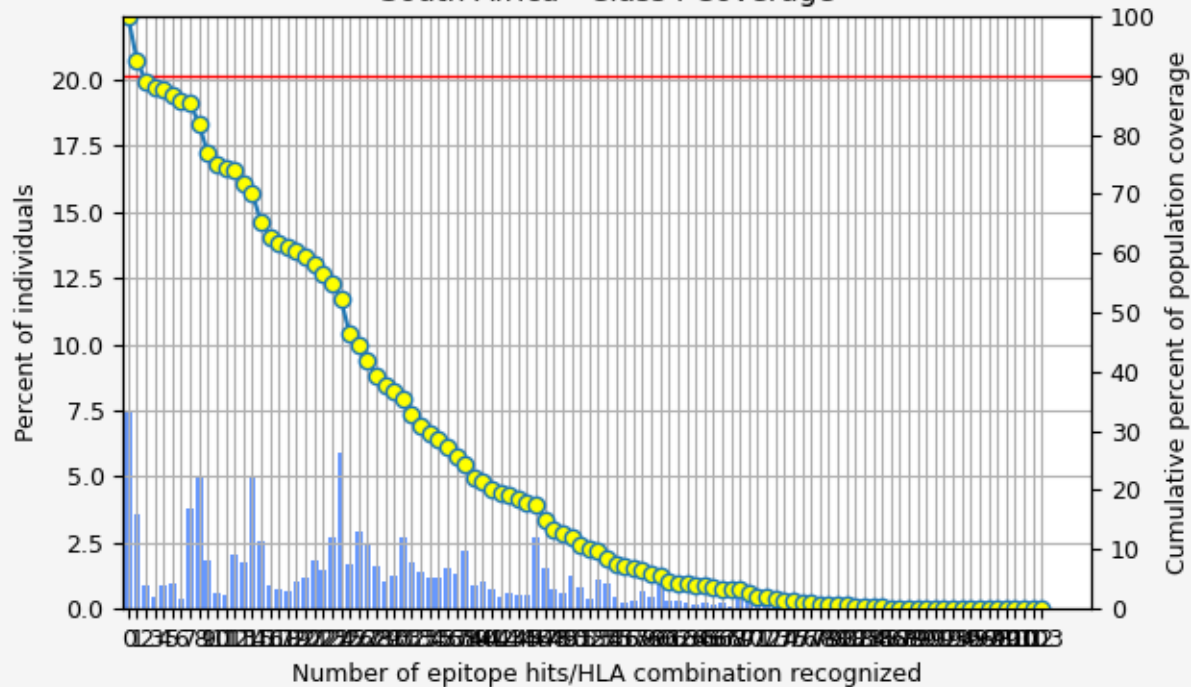

# South America - Class I Coverage

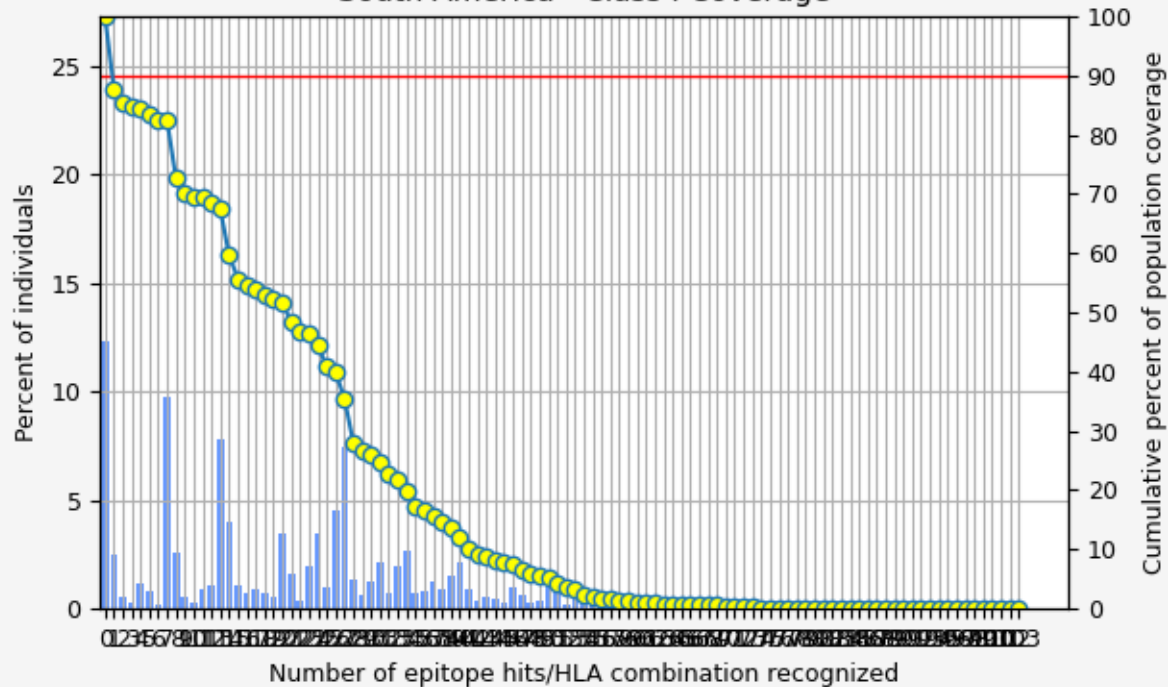

# South Asia - Class I Coverage

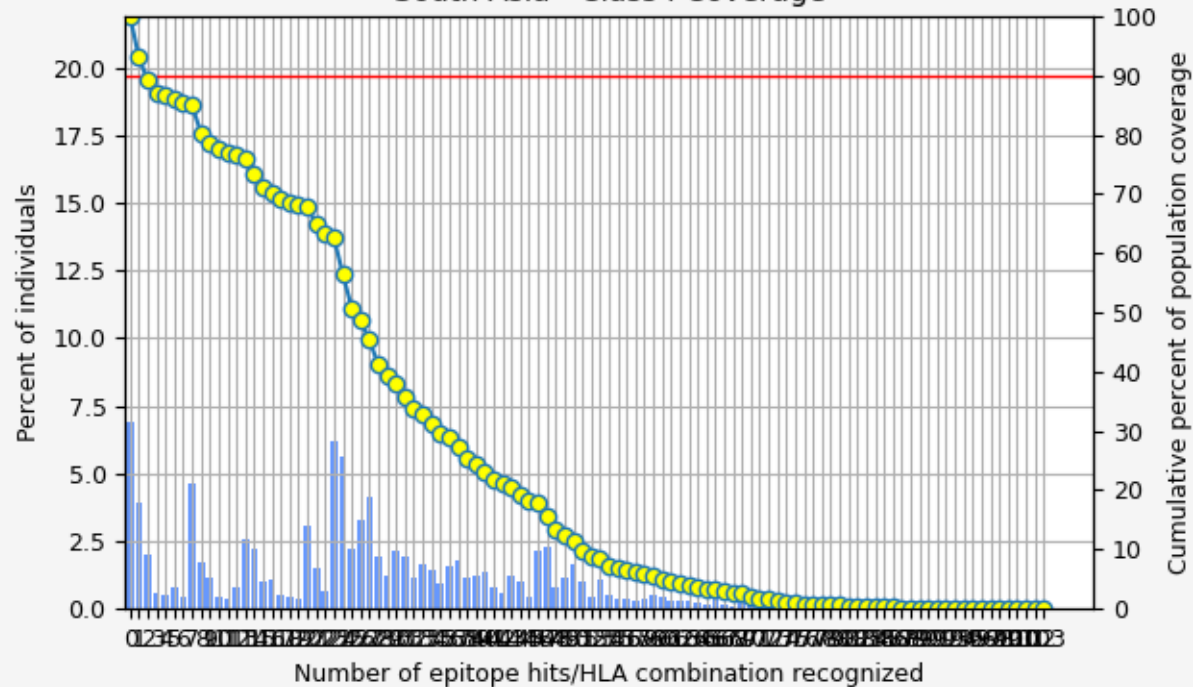

# Southeast Asia - Class I Coverage

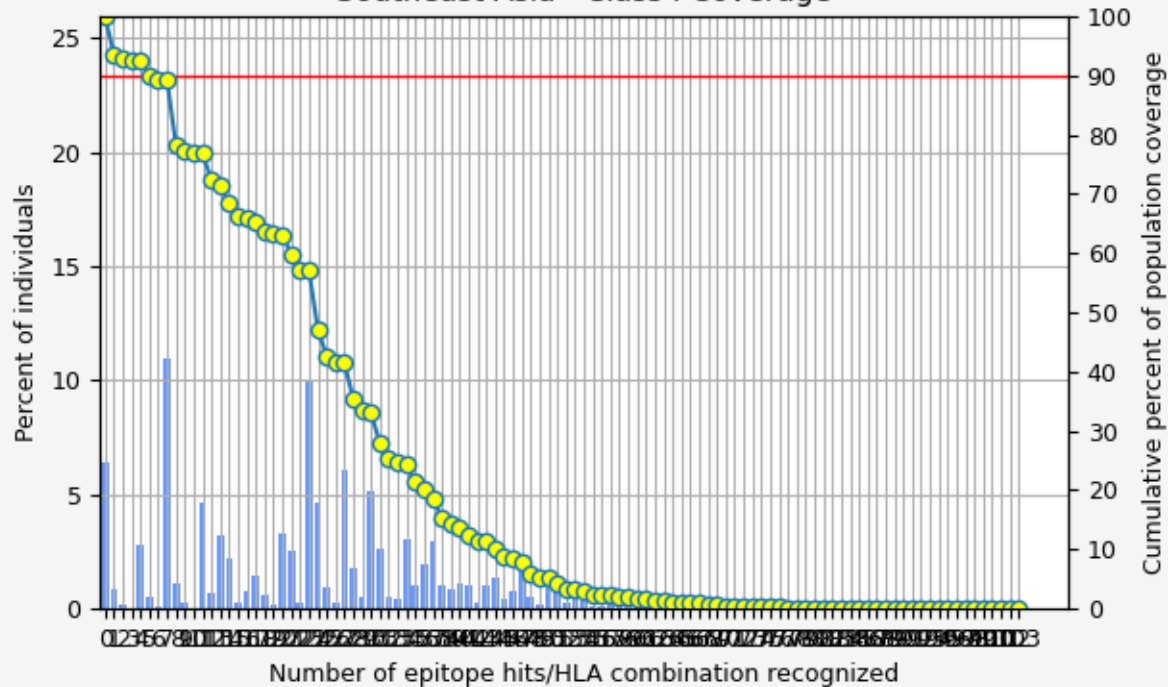

# Southwest Asia - Class I Coverage

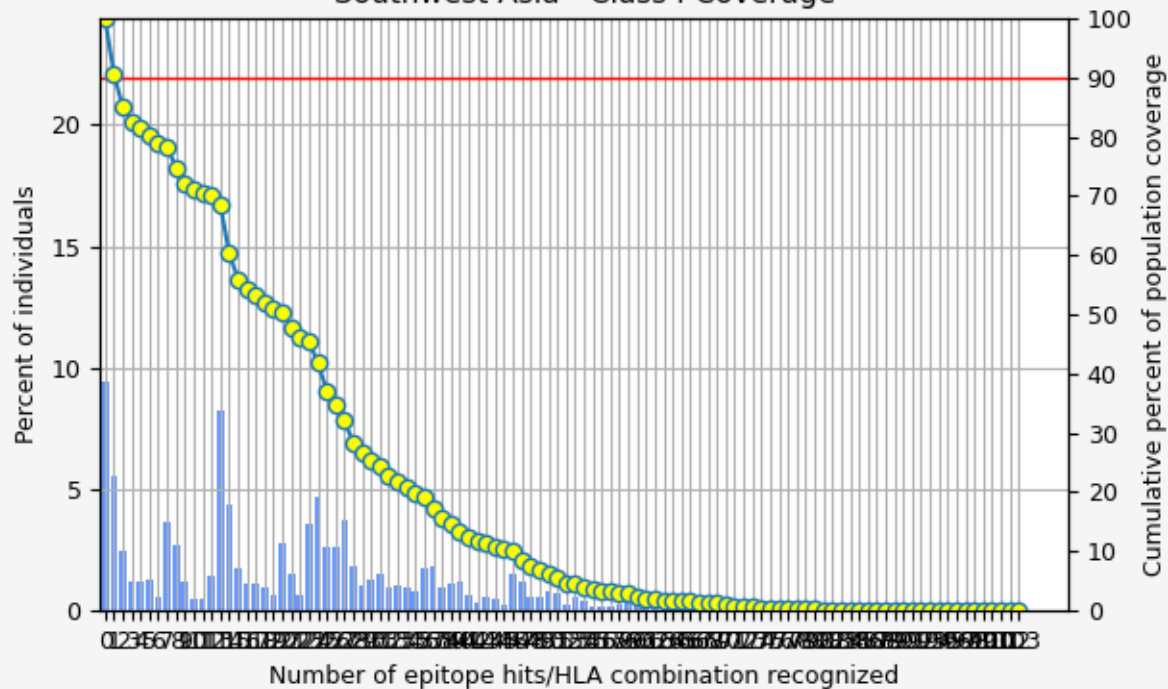

# West Africa - Class I Coverage

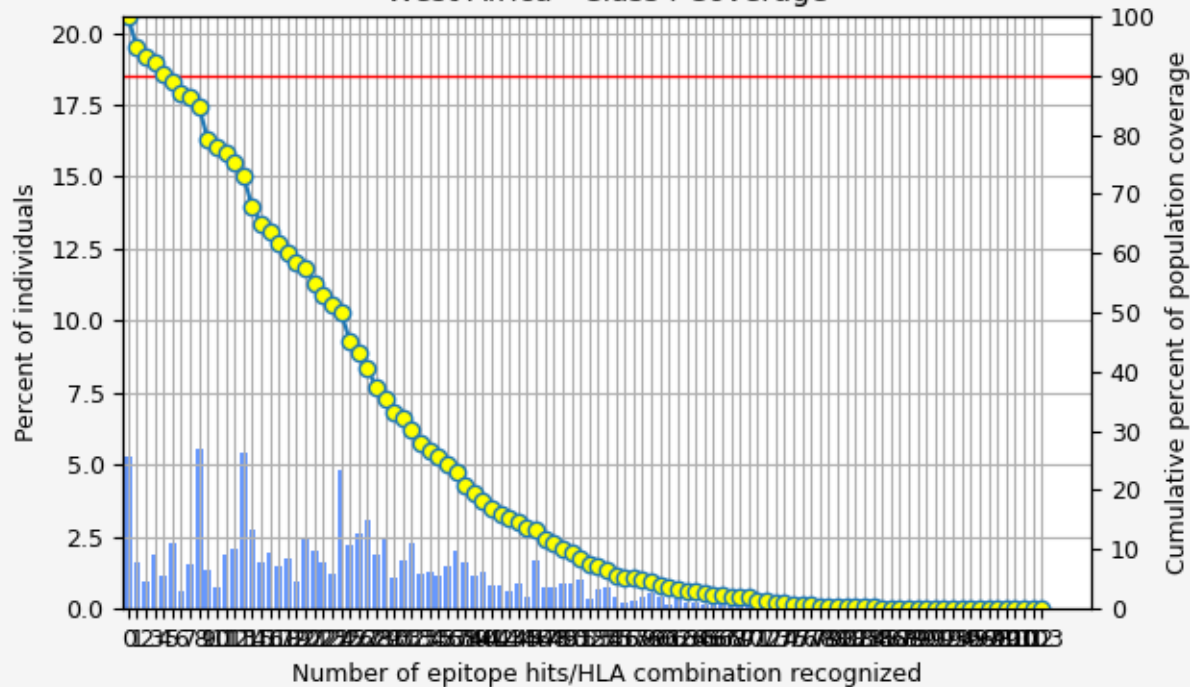



West Indies - Class I Coverage

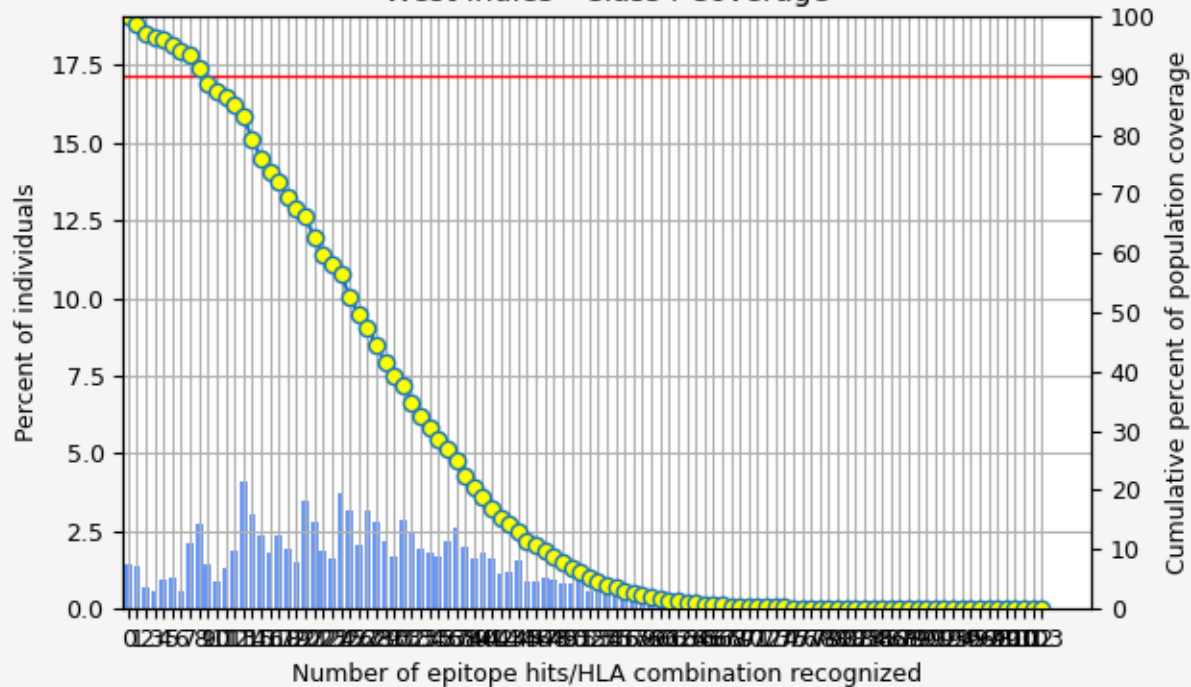

Supplement: s1 [file s1]
