# Supplementary material for: AutoEpiCollect, a Novel Machine Learning-Based GUI Software for Vaccine Design: Application to Pan-Cancer Vaccine Design Targeting PIK3CA Neoantigens
Source: MDPI journal article supplement (doi:10.3390/bioengineering11040322), 2024-03-27

World - Class I Coverage

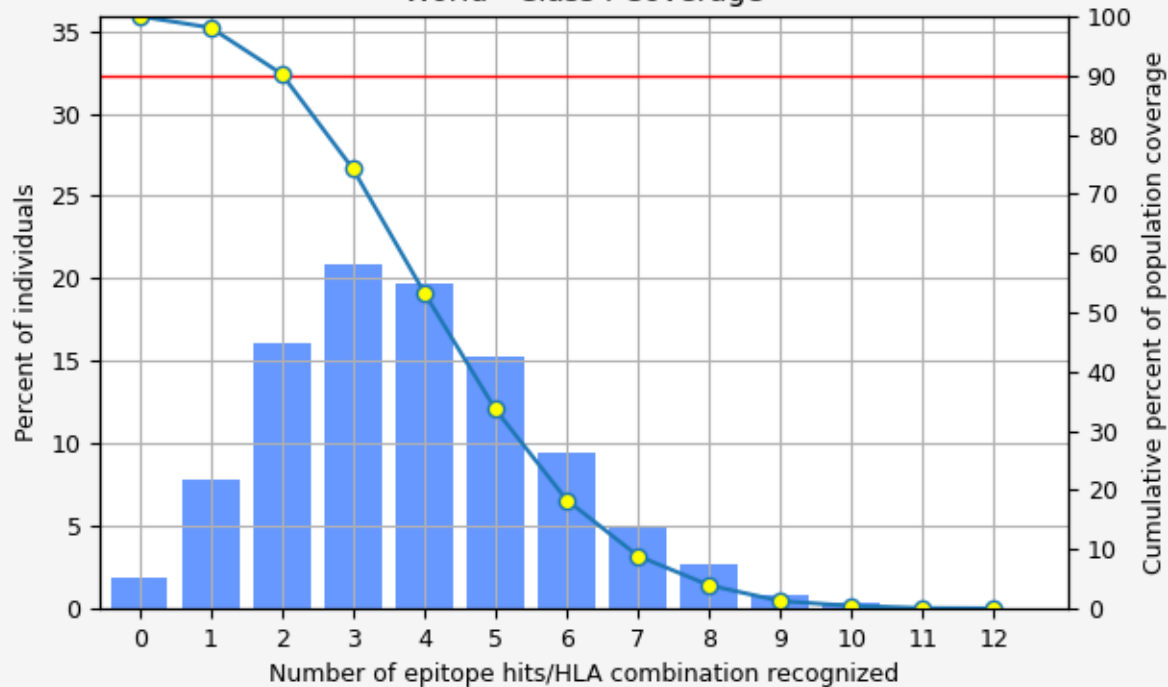

Central Africa - Class I Coverage

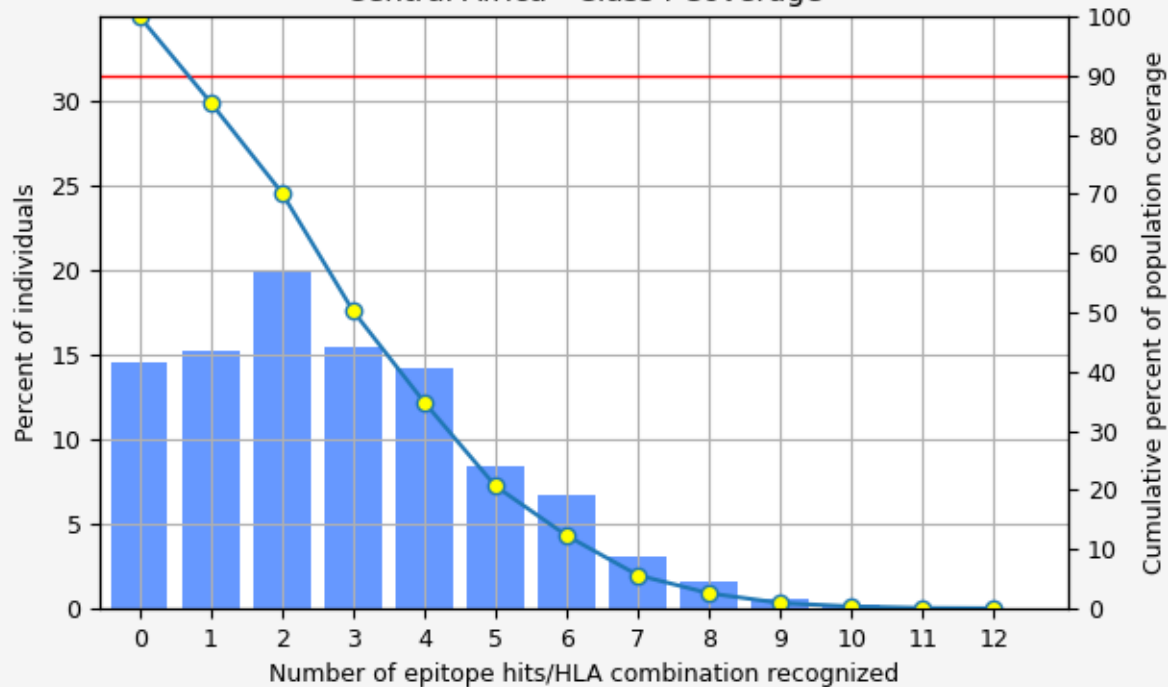

Central America - Class I Coverage

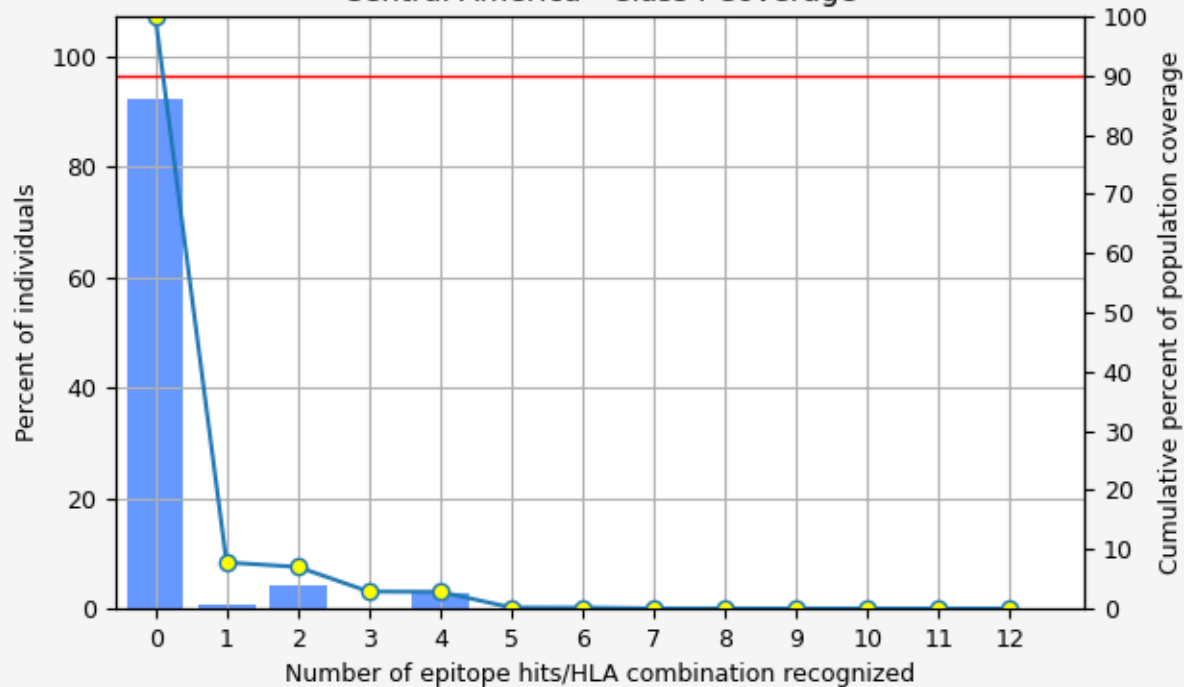

East Africa - Class I Coverage

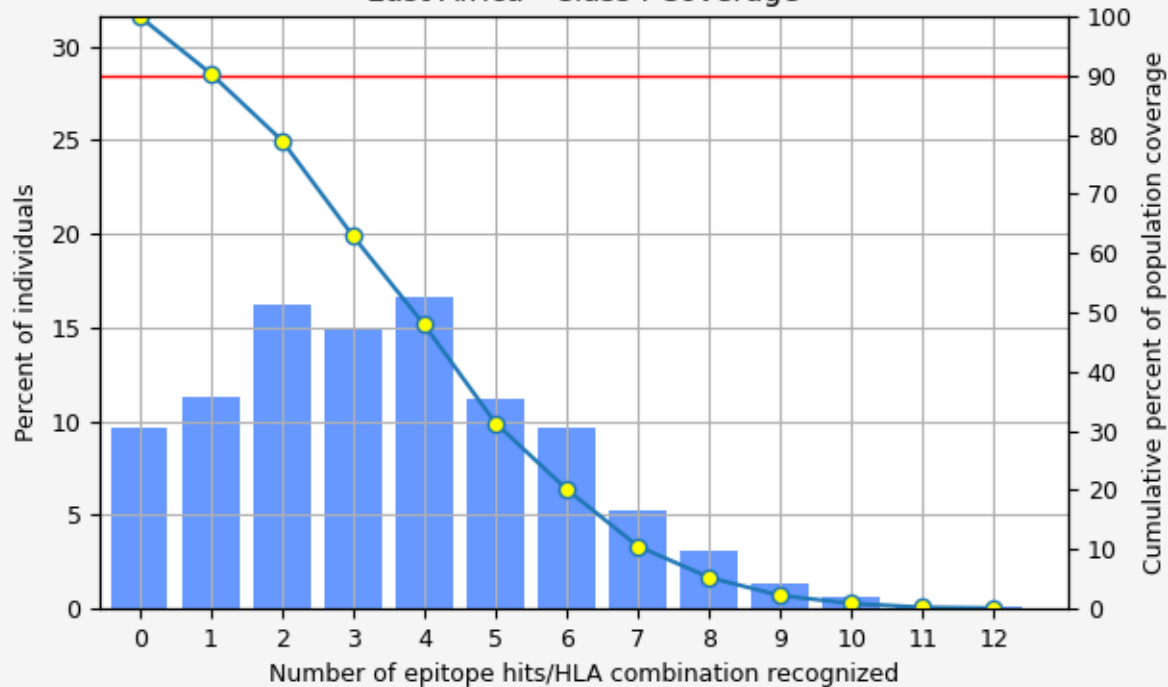

East Asia - Class I Coverage

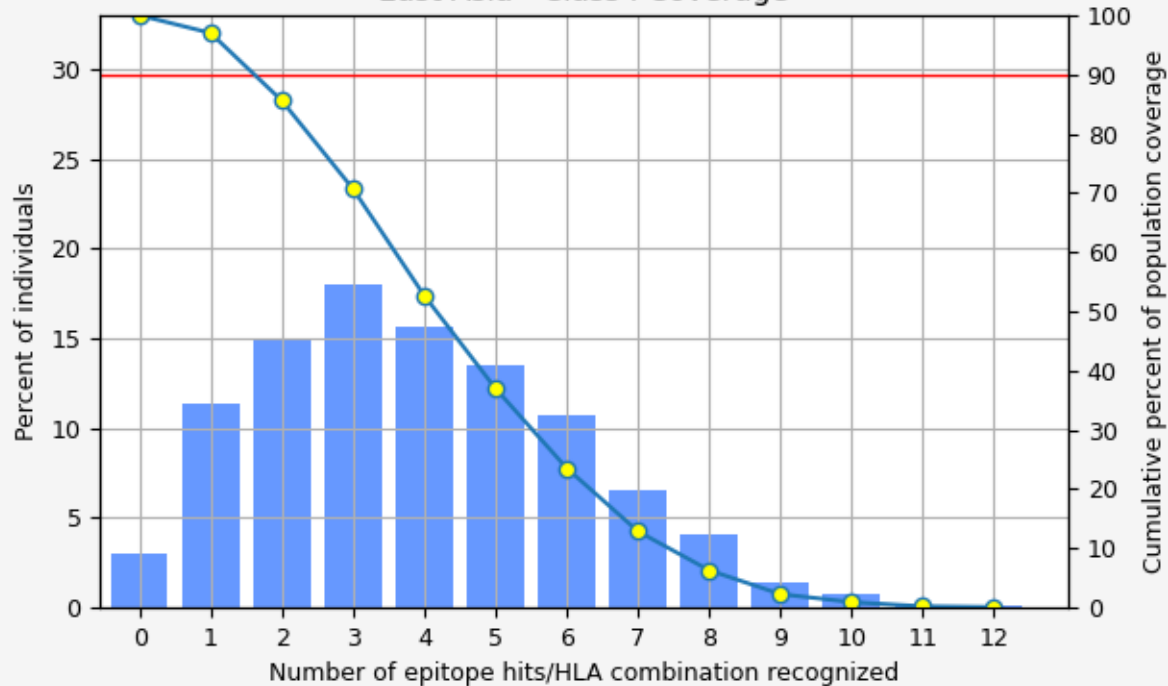

Europe - Class I Coverage

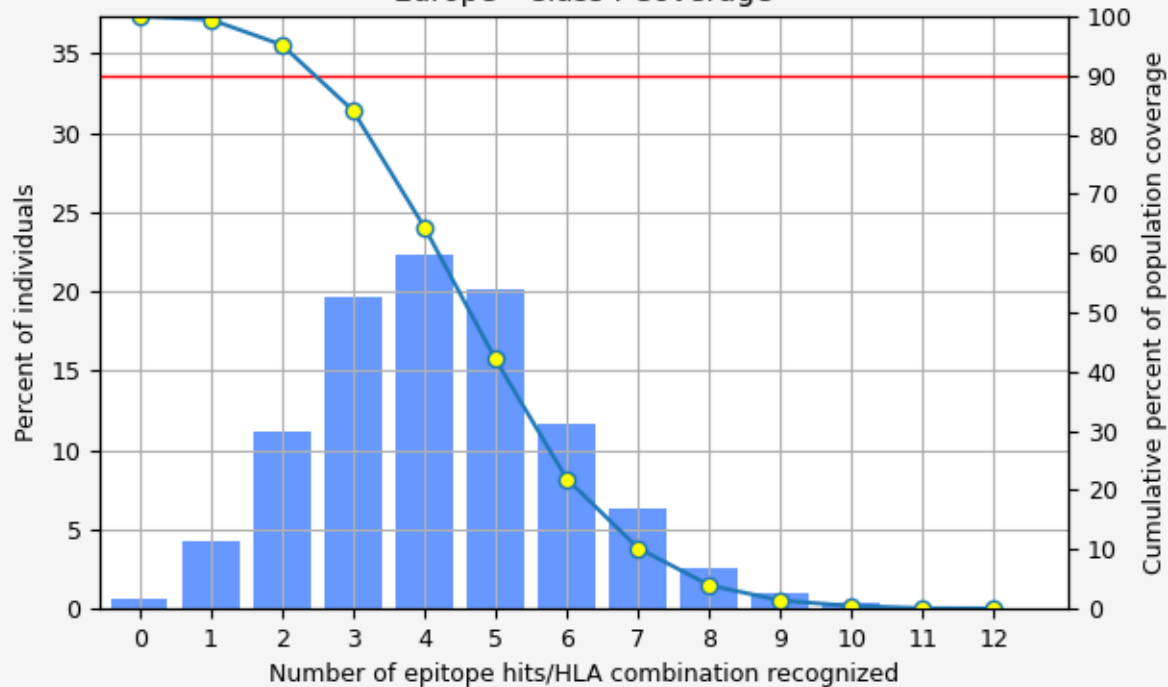

North Africa - Class I Coverage

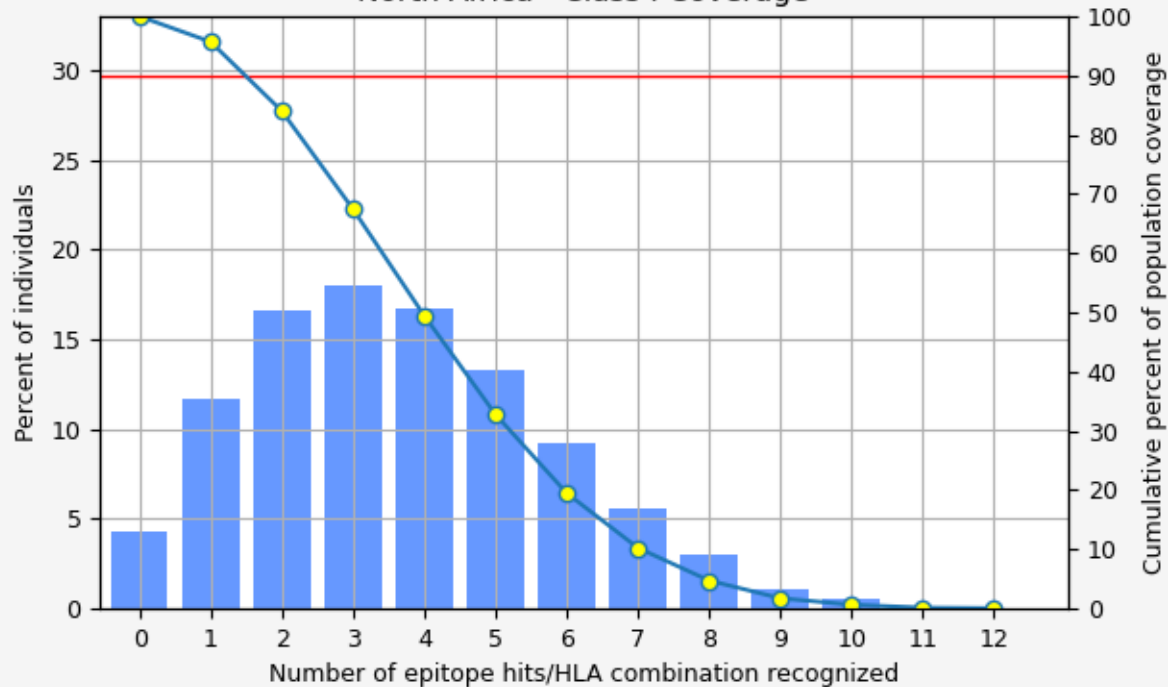

# North America - Class I Coverage

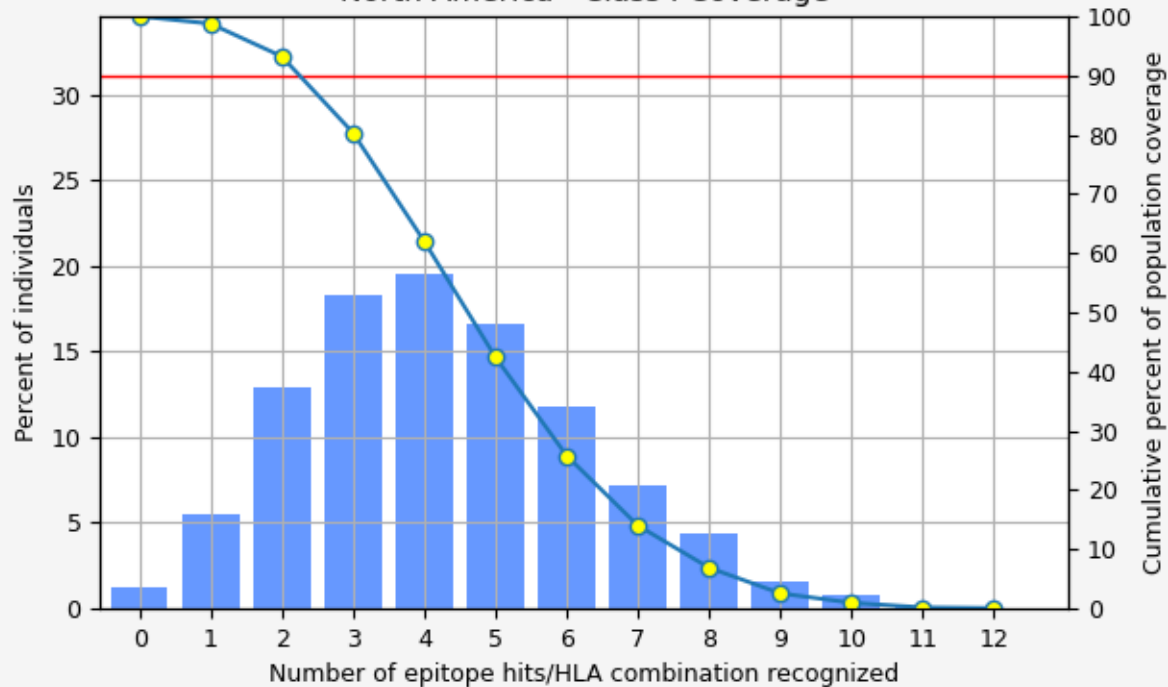



# Northeast Asia - Class I Coverage

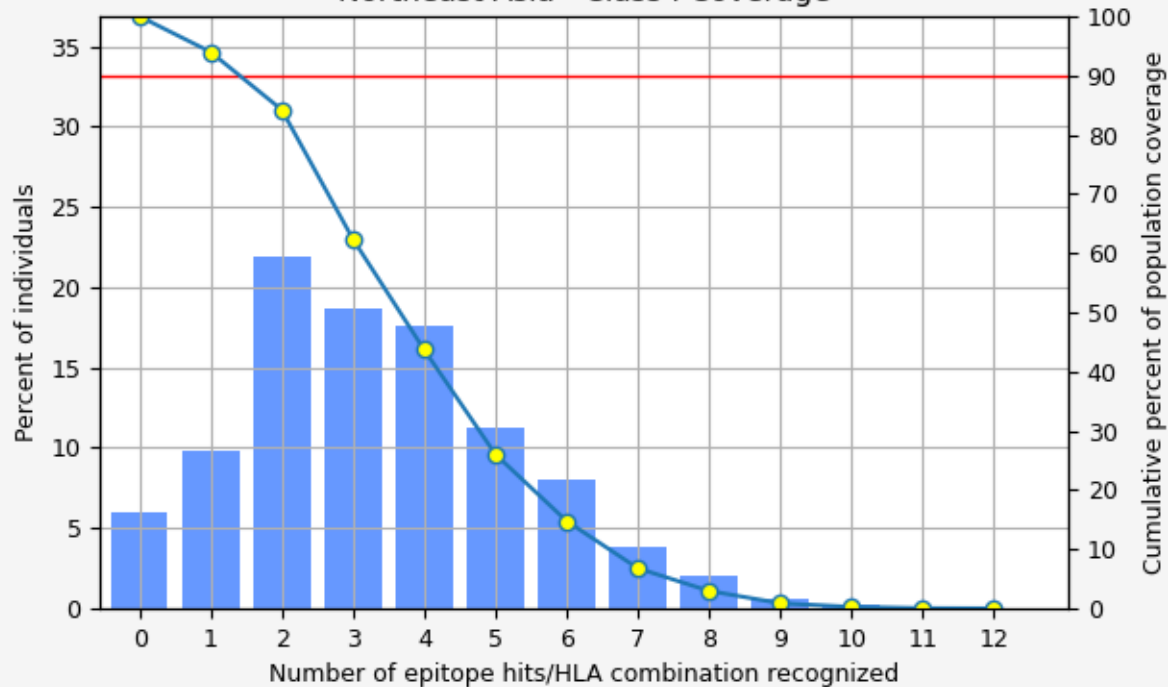

Oceania - Class I Coverage

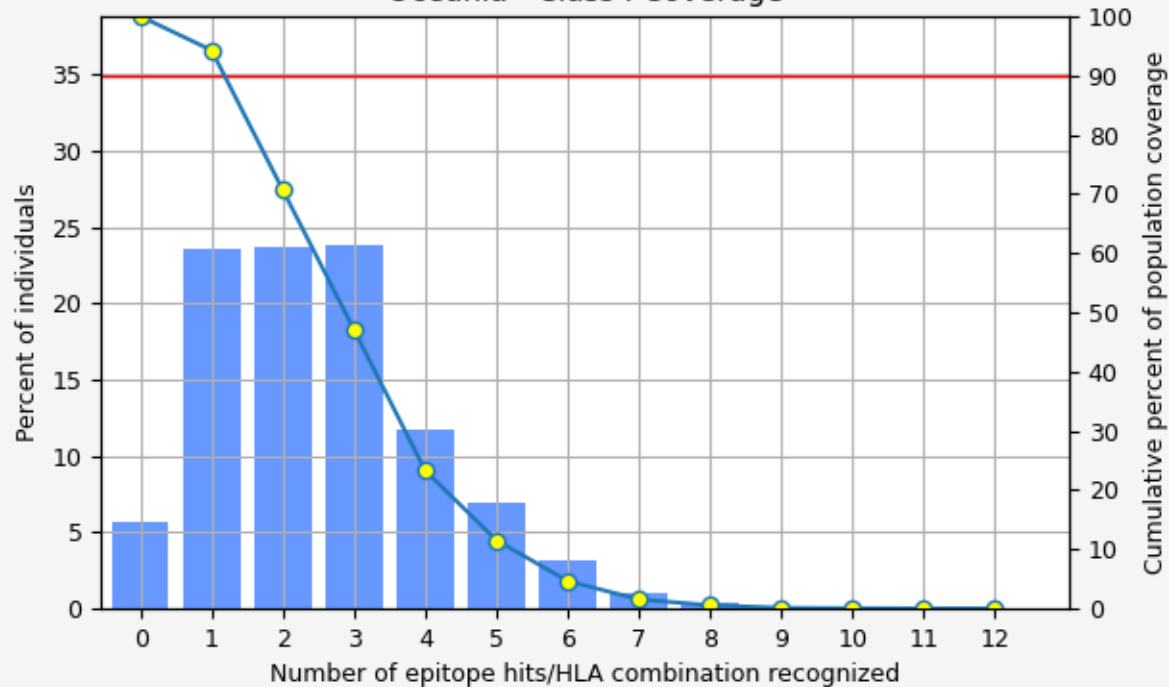

South Africa - Class I Coverage

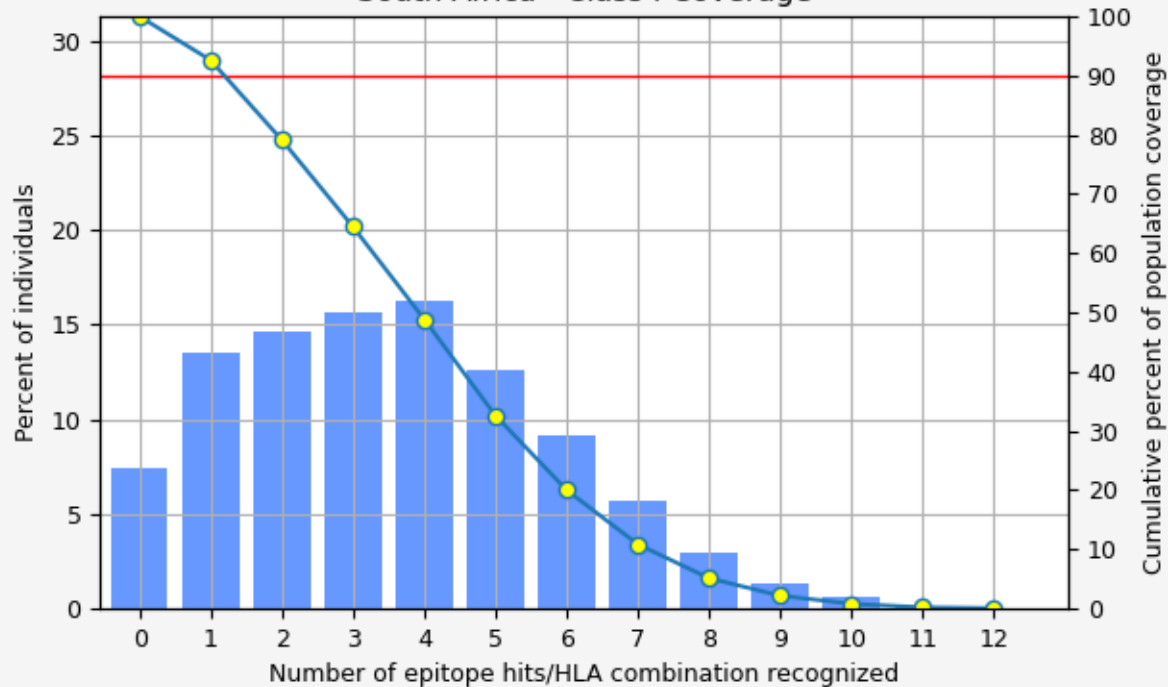

South America - Class I Coverage

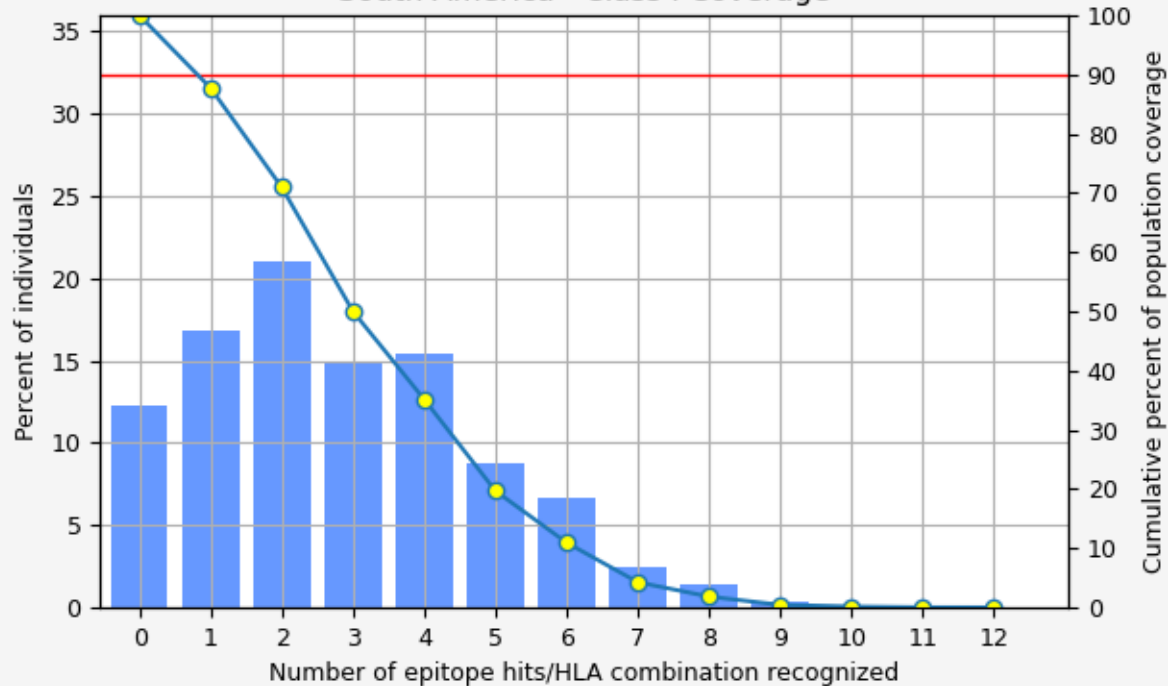

South Asia - Class I Coverage

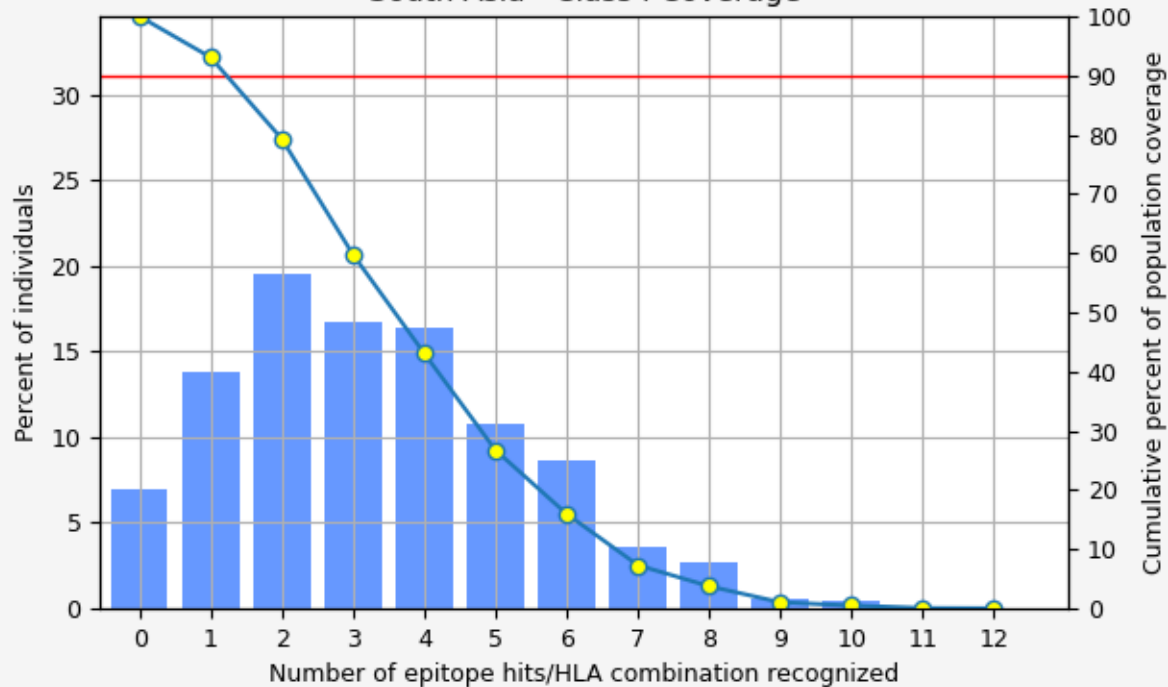

Southeast Asia - Class I Coverage

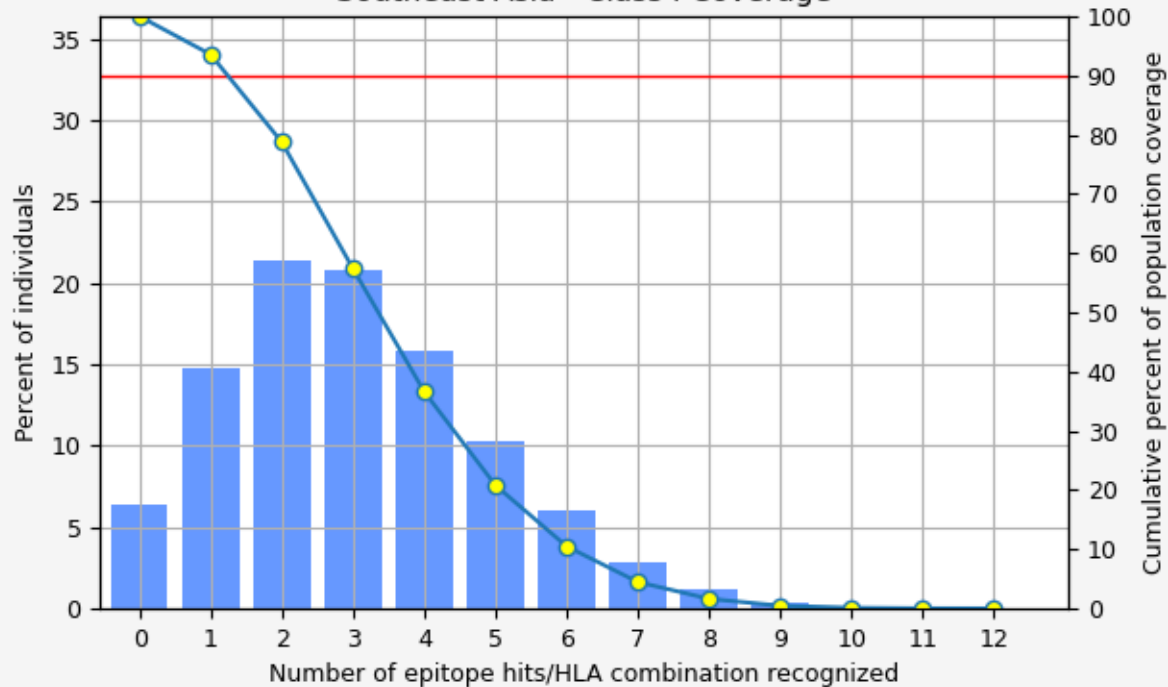

Southwest Asia - Class I Coverage

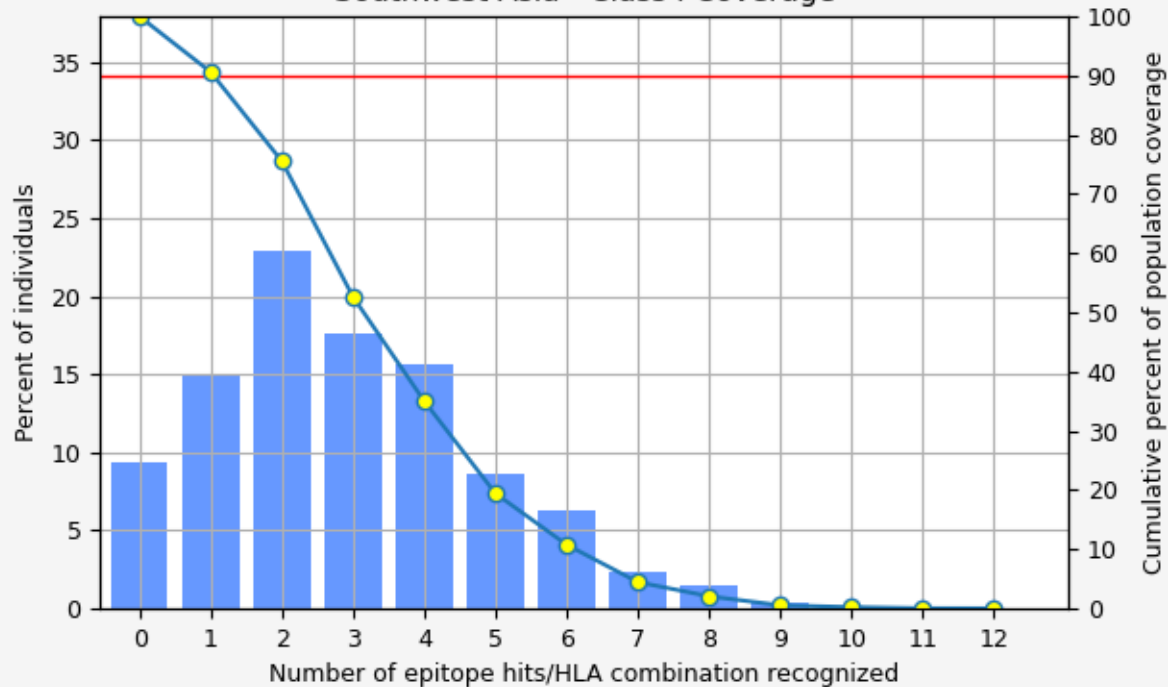

West Africa - Class I Coverage

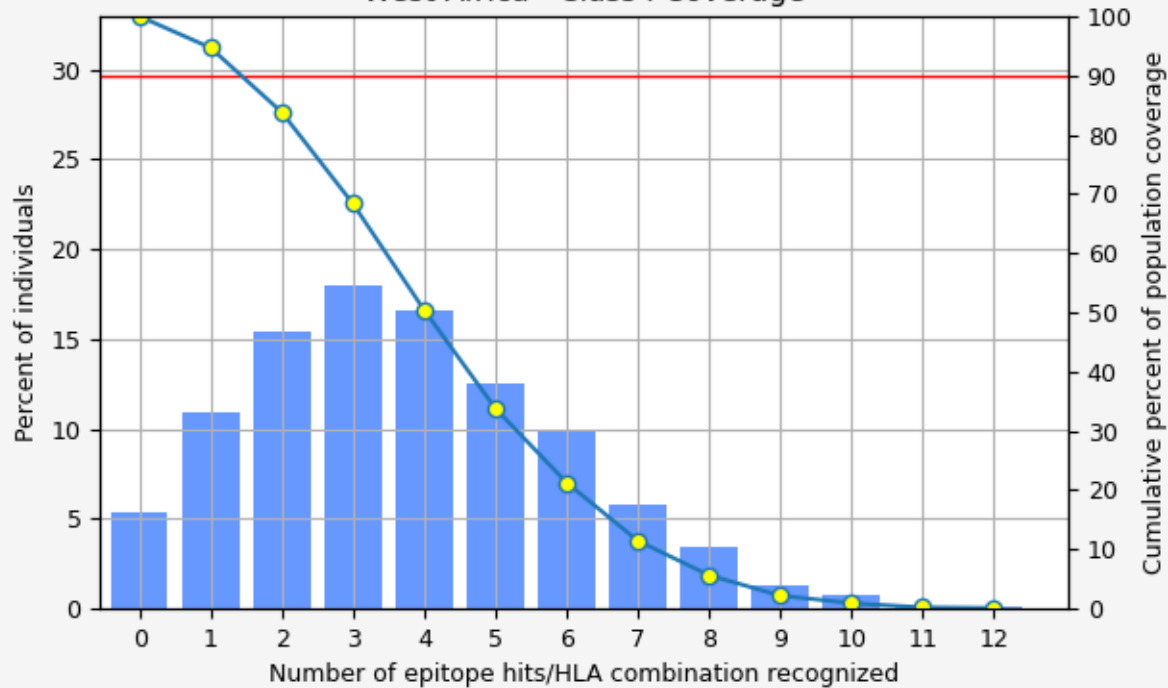



West Indies - Class I Coverage

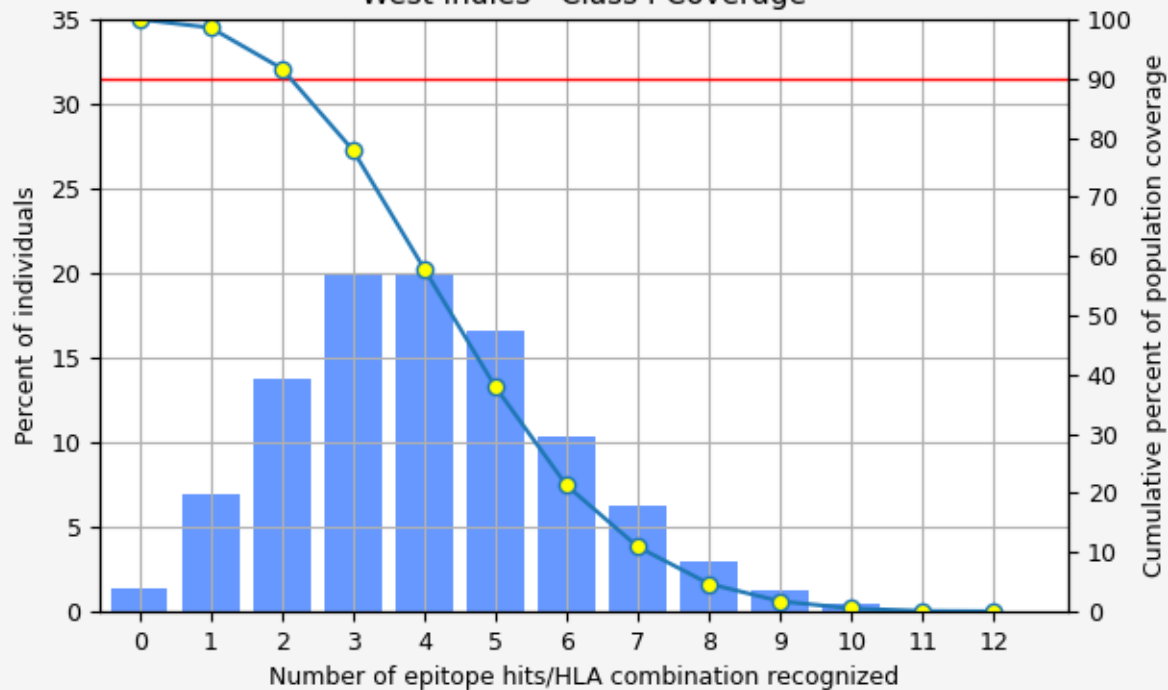

Supplement: s1 [file s1]
