# Supplementary material for: AutoEpiCollect, a Novel Machine Learning-Based GUI Software for Vaccine Design: Application to Pan-Cancer Vaccine Design Targeting PIK3CA Neoantigens
Source: MDPI journal article supplement (doi:10.3390/bioengineering11040322), 2024-03-27

World - Class II Coverage

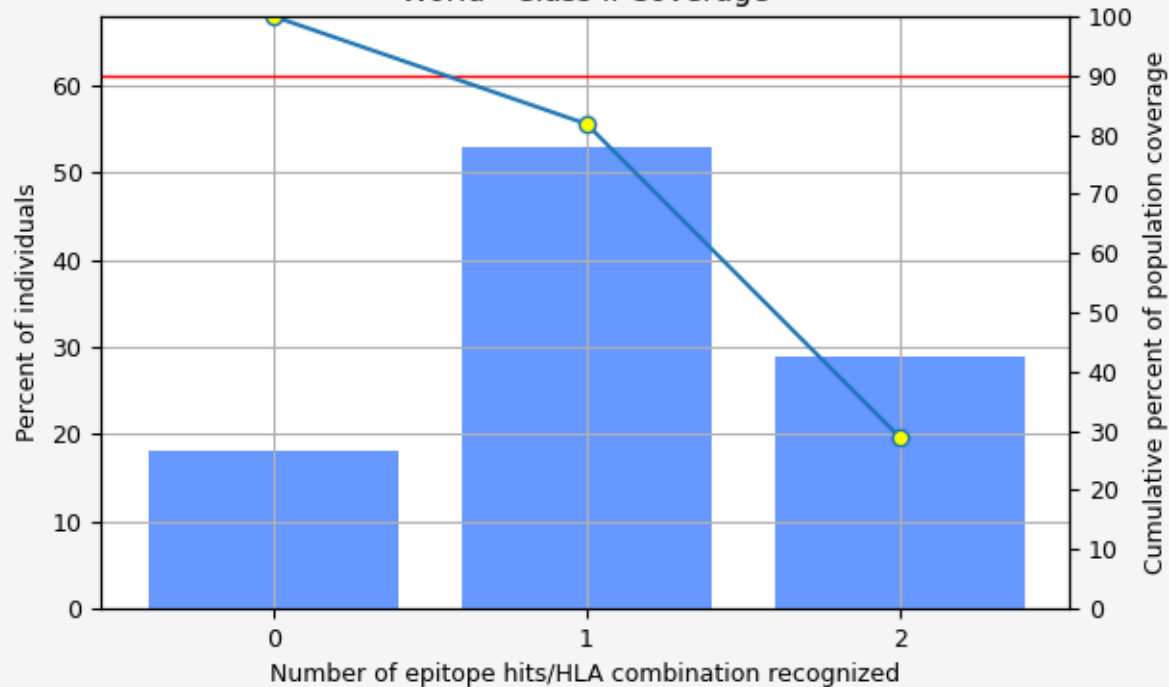

Central Africa - Class II Coverage

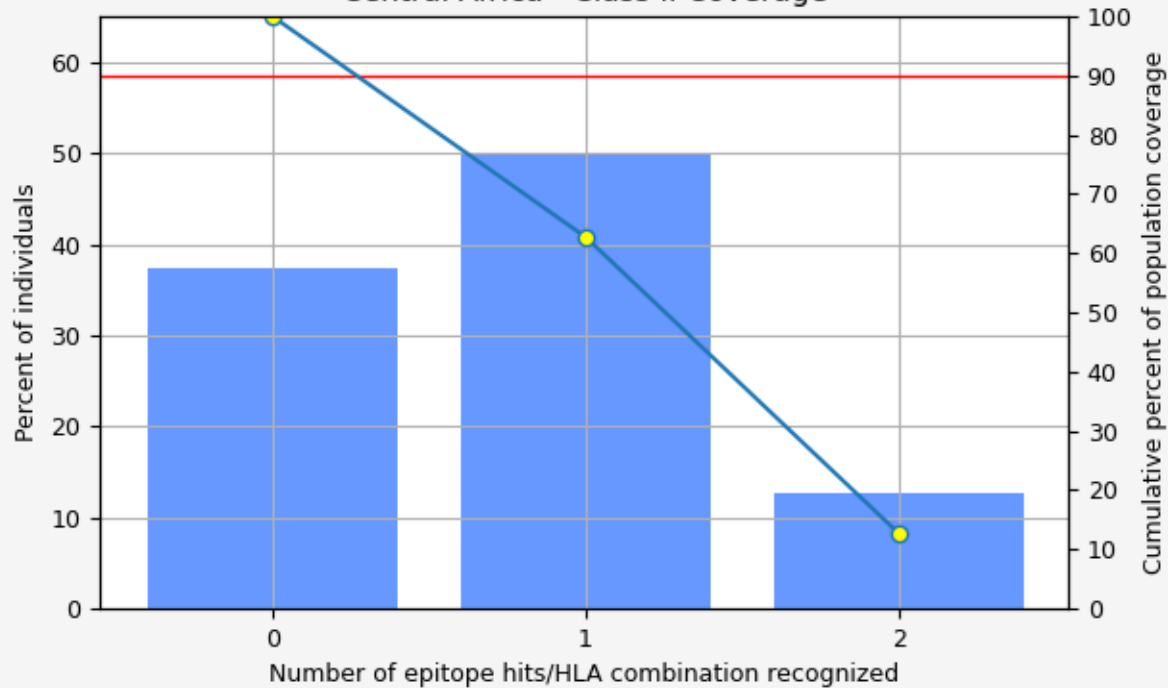

Central America - Class II Coverage

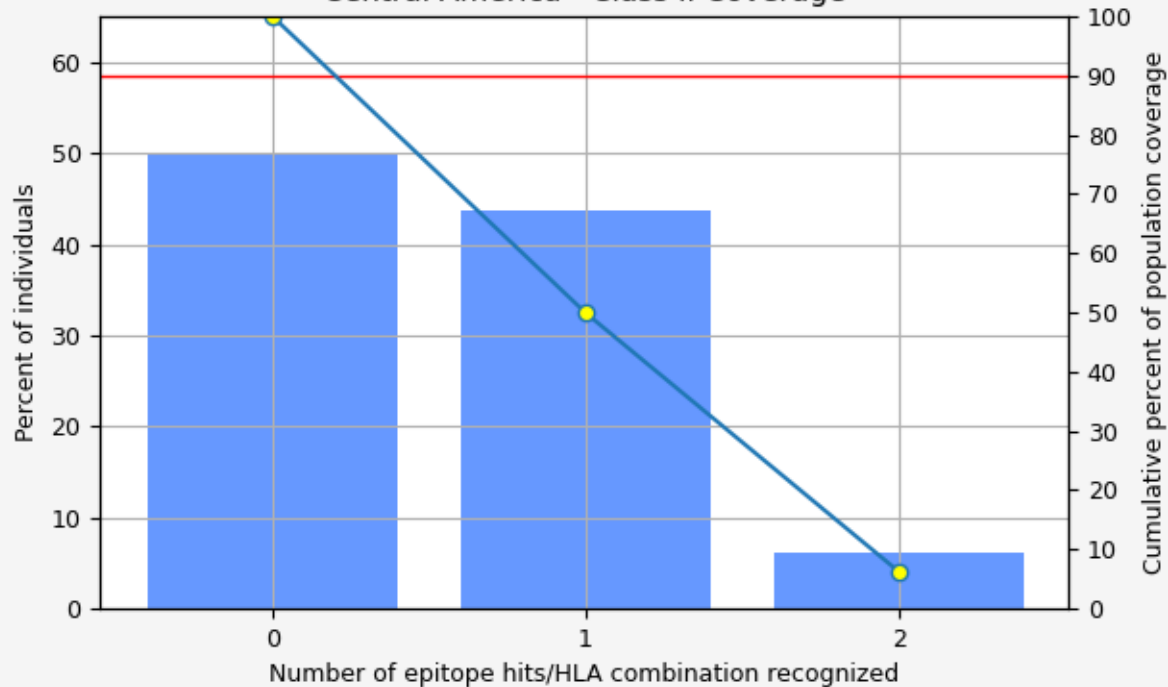

East Africa - Class II Coverage

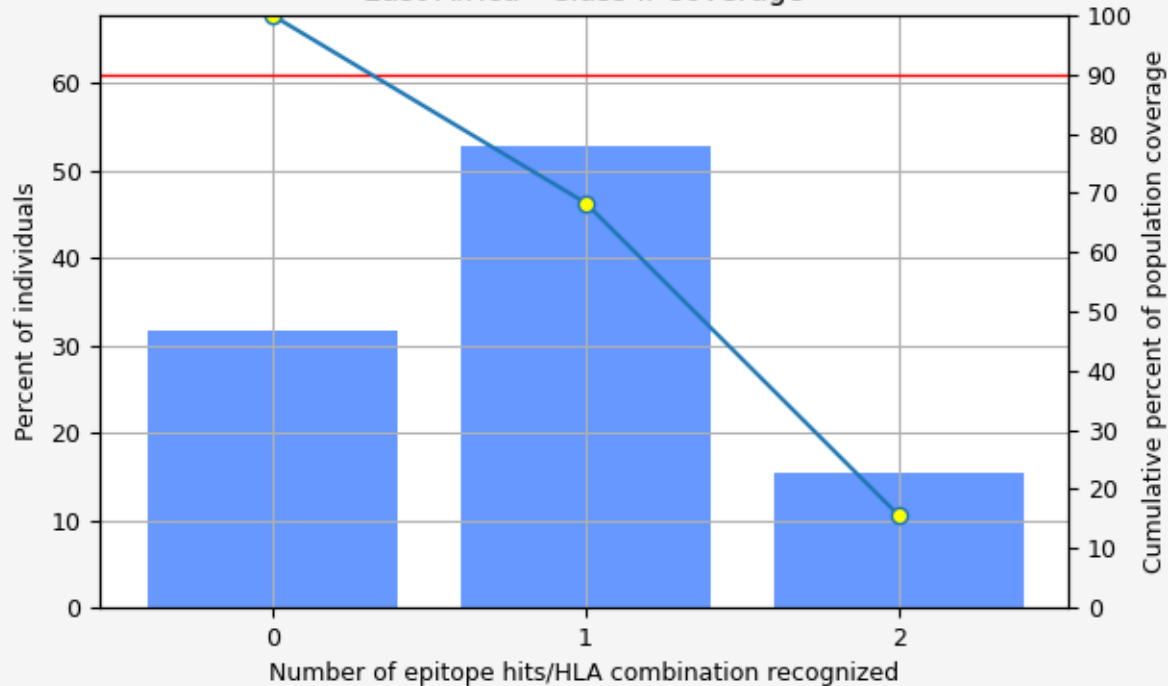

East Asia - Class II Coverage

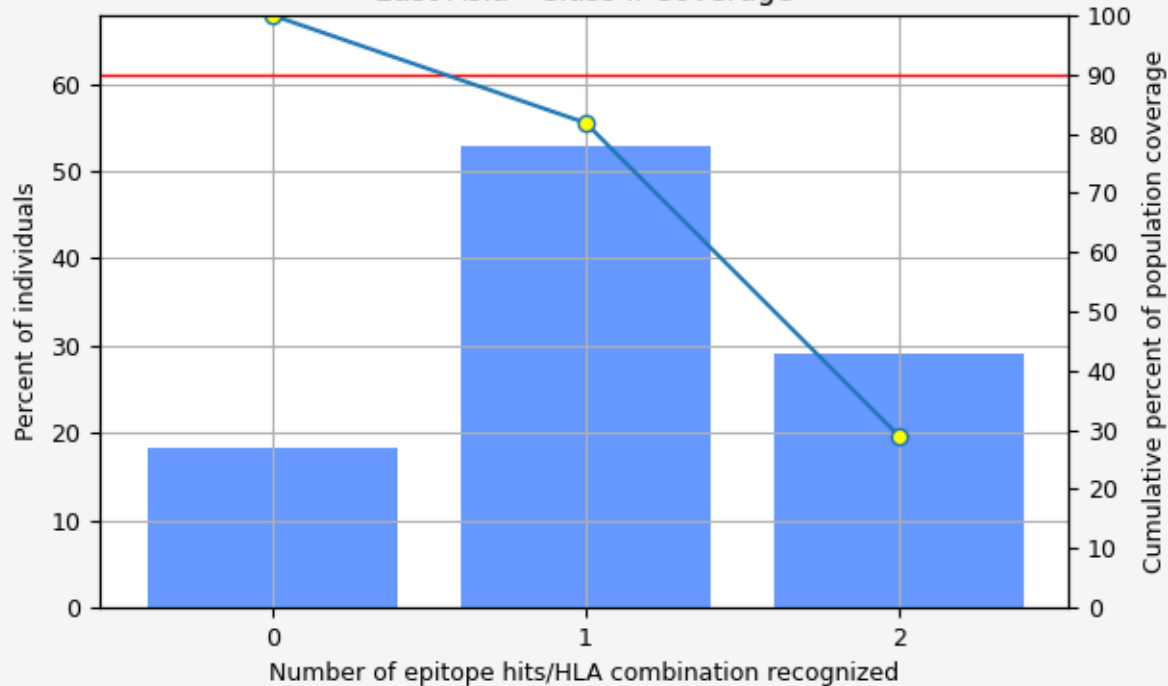

Europe - Class II Coverage

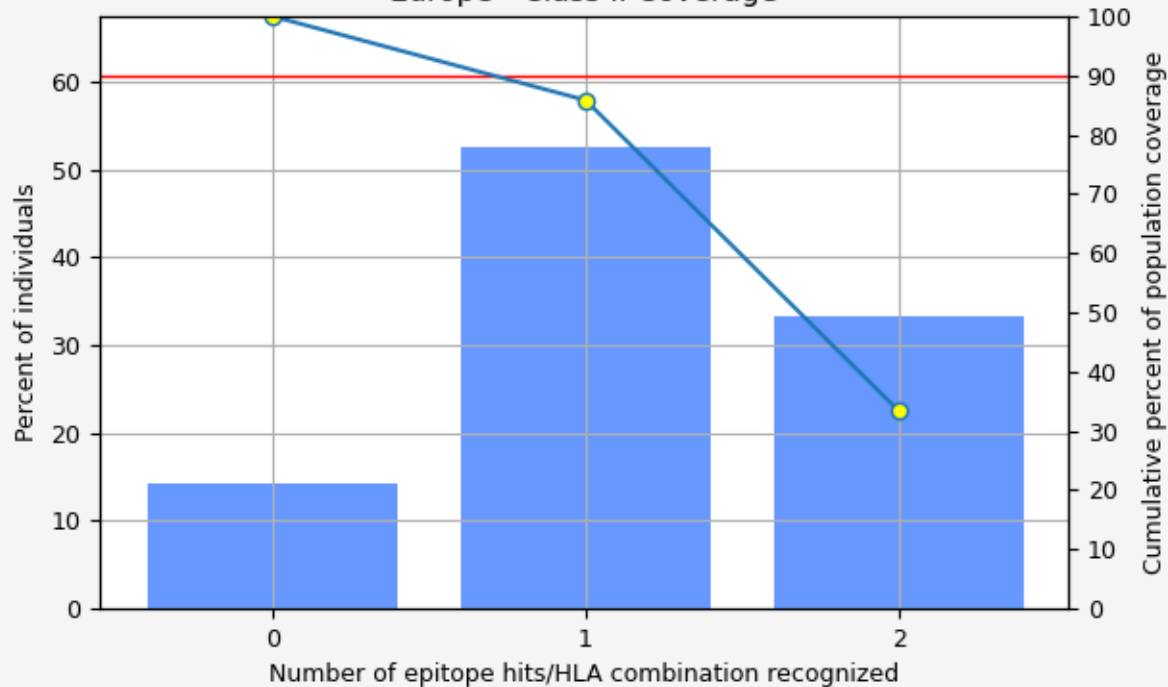

North Africa - Class II Coverage

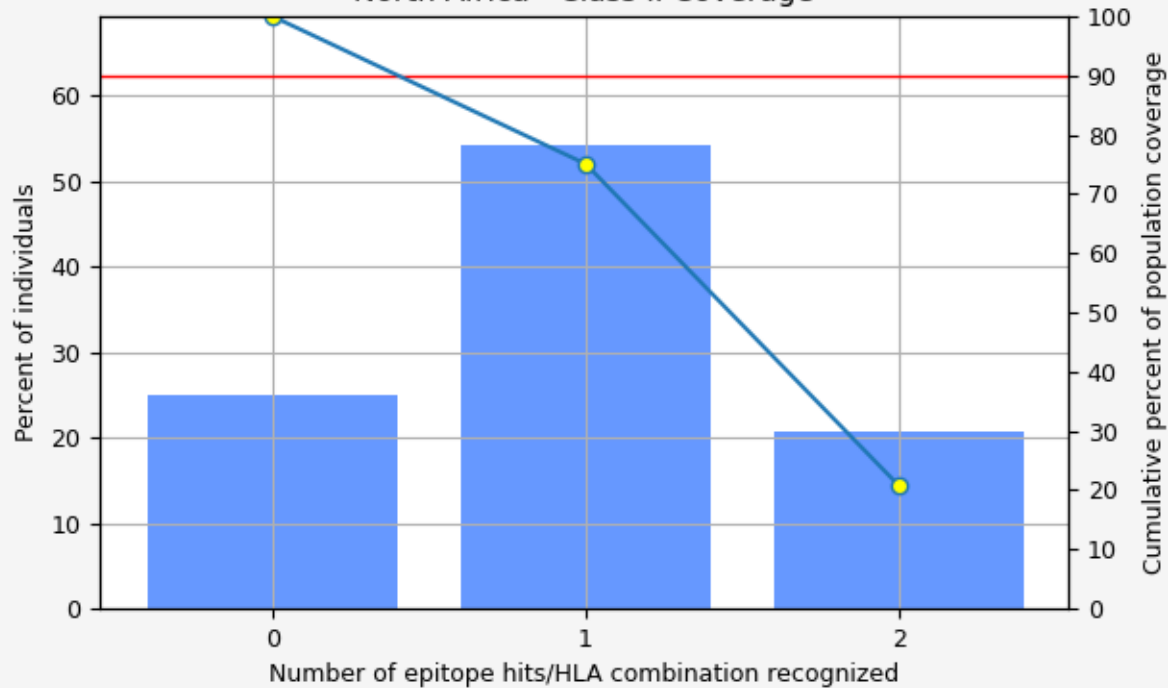

North America - Class II Coverage

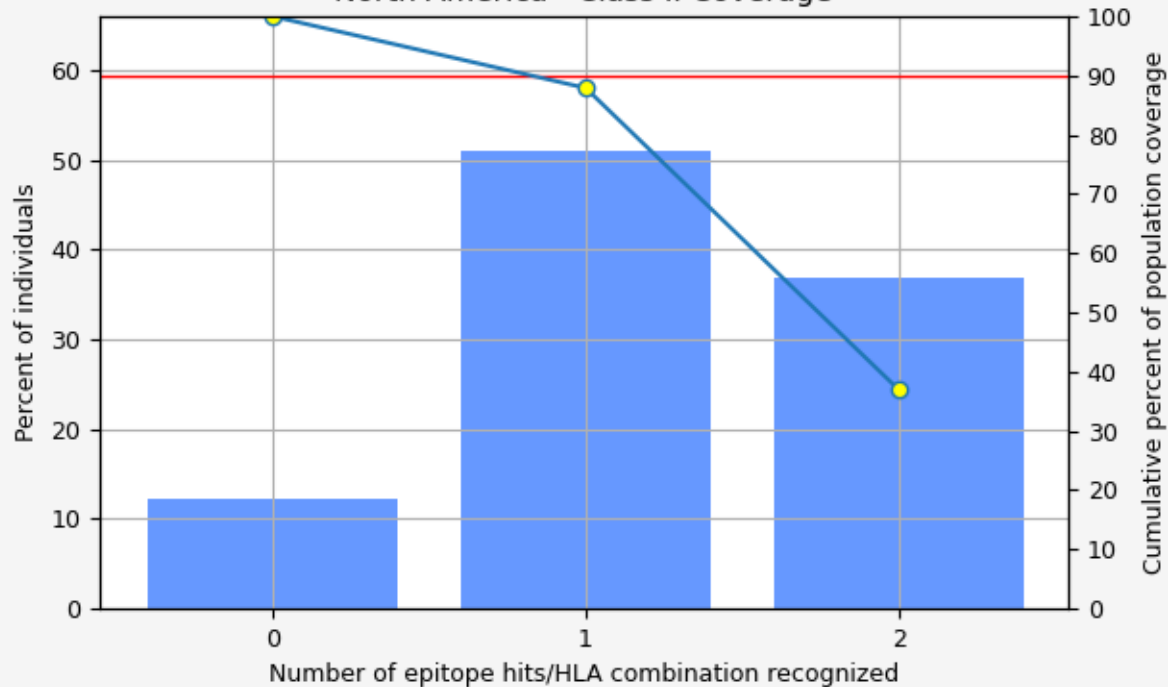



Northeast Asia - Class II Coverage

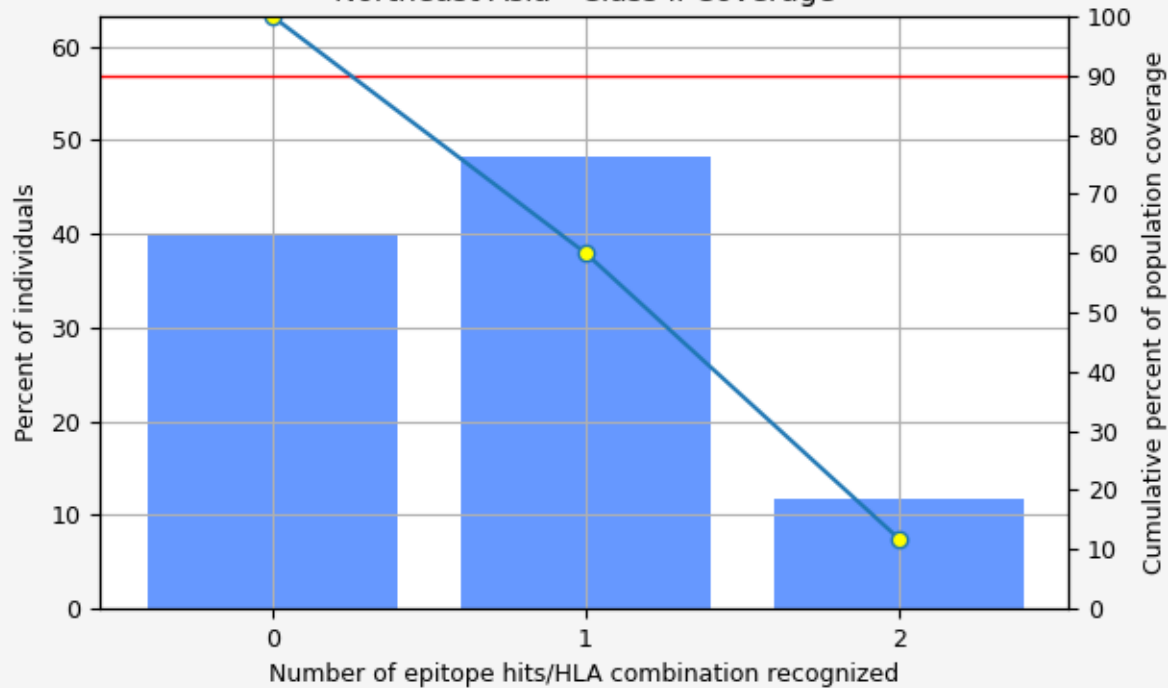

Oceania - Class II Coverage

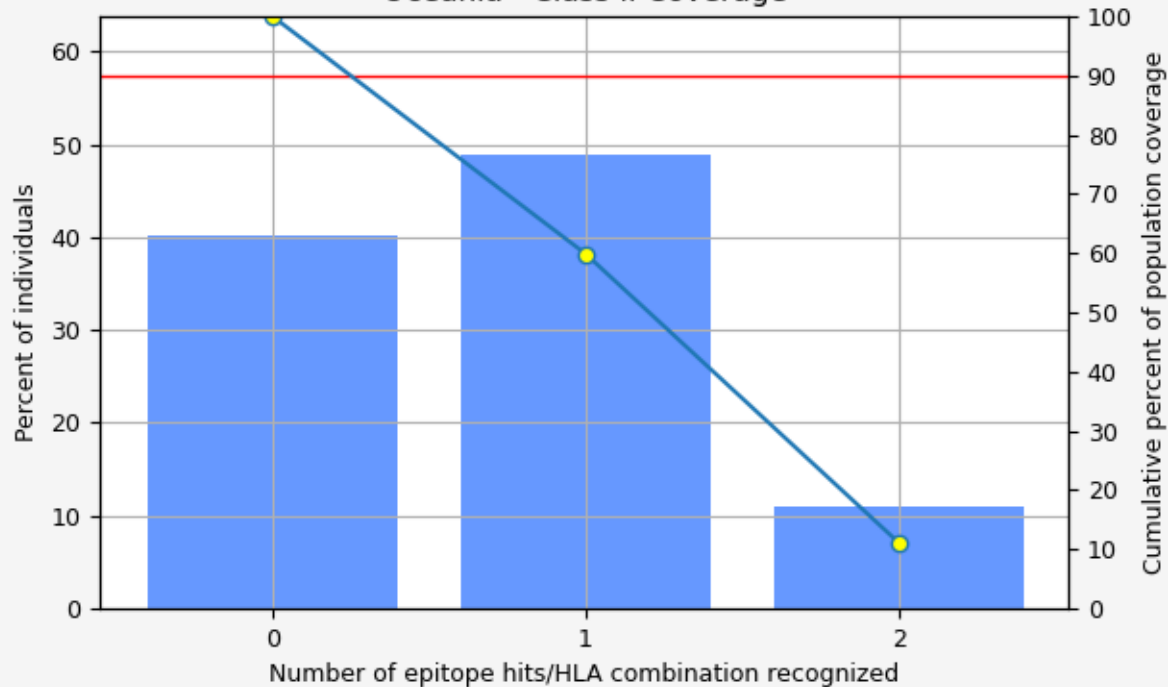

South Africa - Class II Coverage

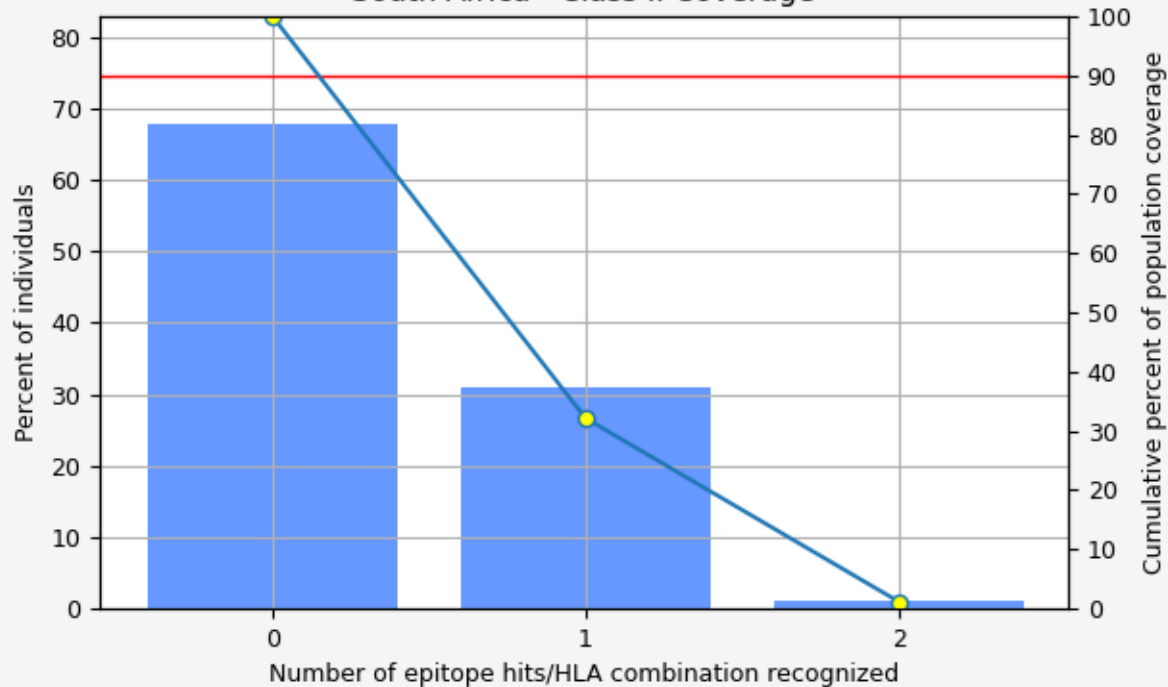

South America - Class II Coverage

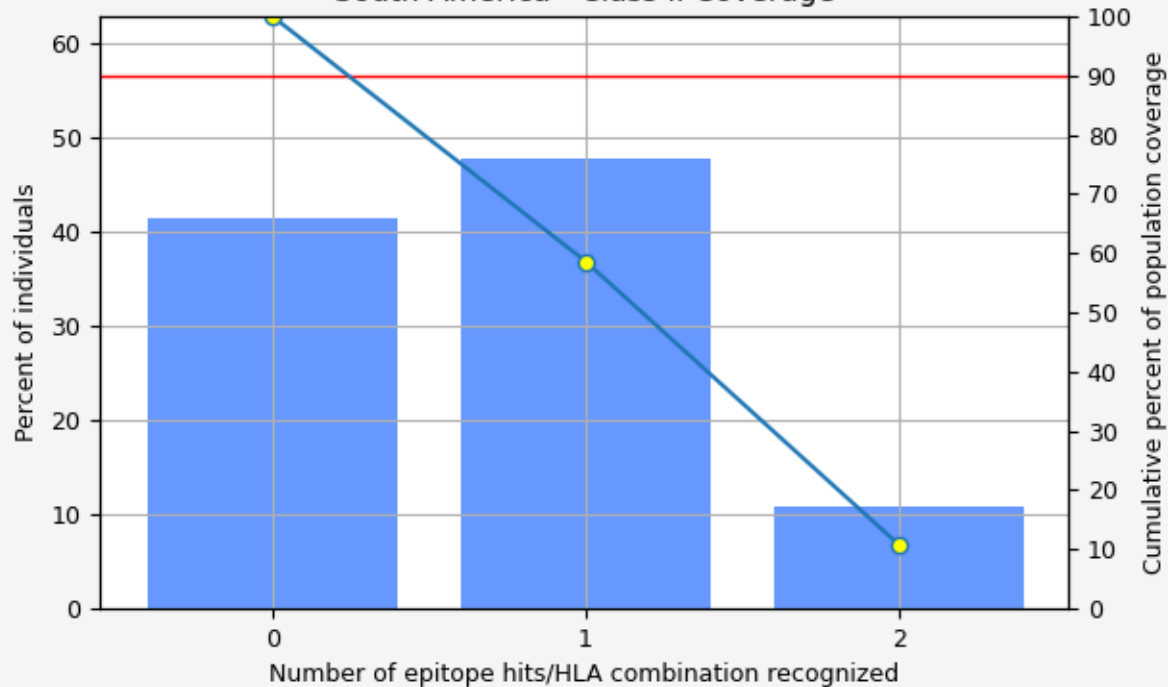

South Asia - Class II Coverage

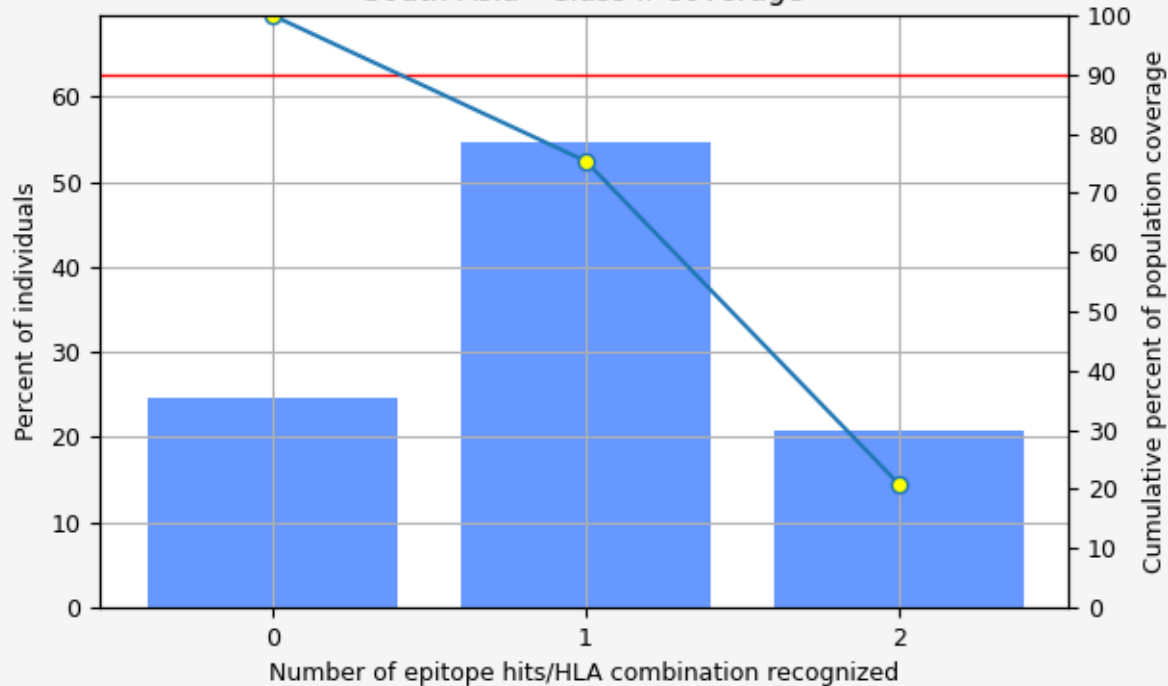

Southeast Asia - Class II Coverage

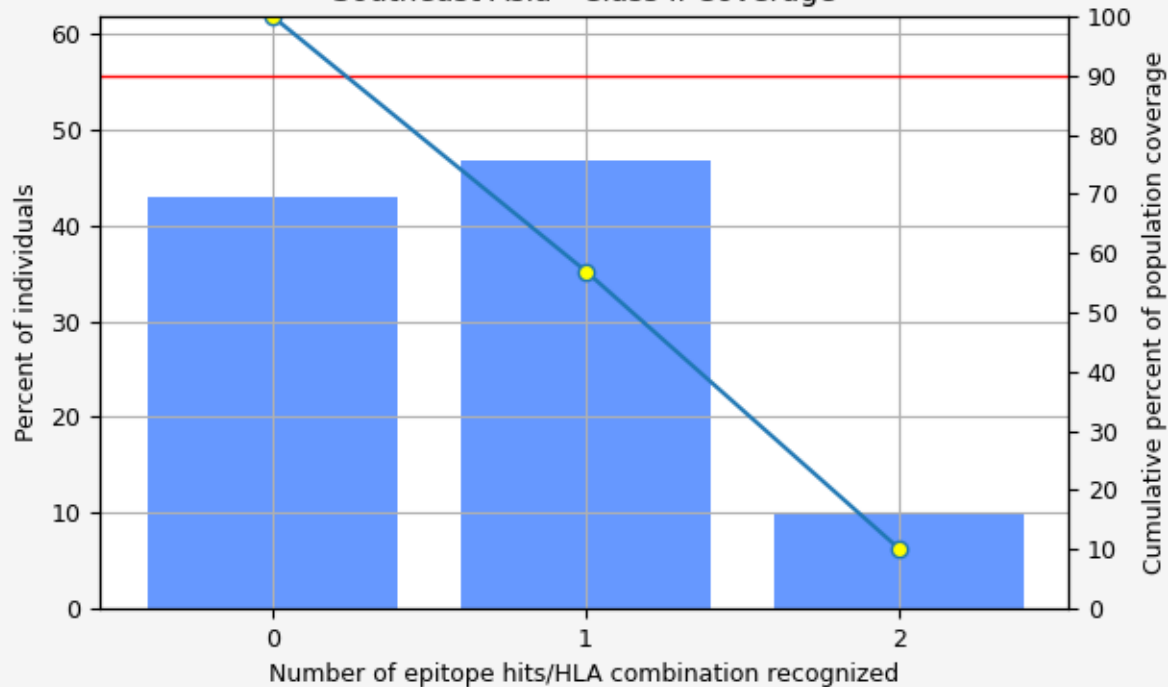

Southwest Asia - Class II Coverage

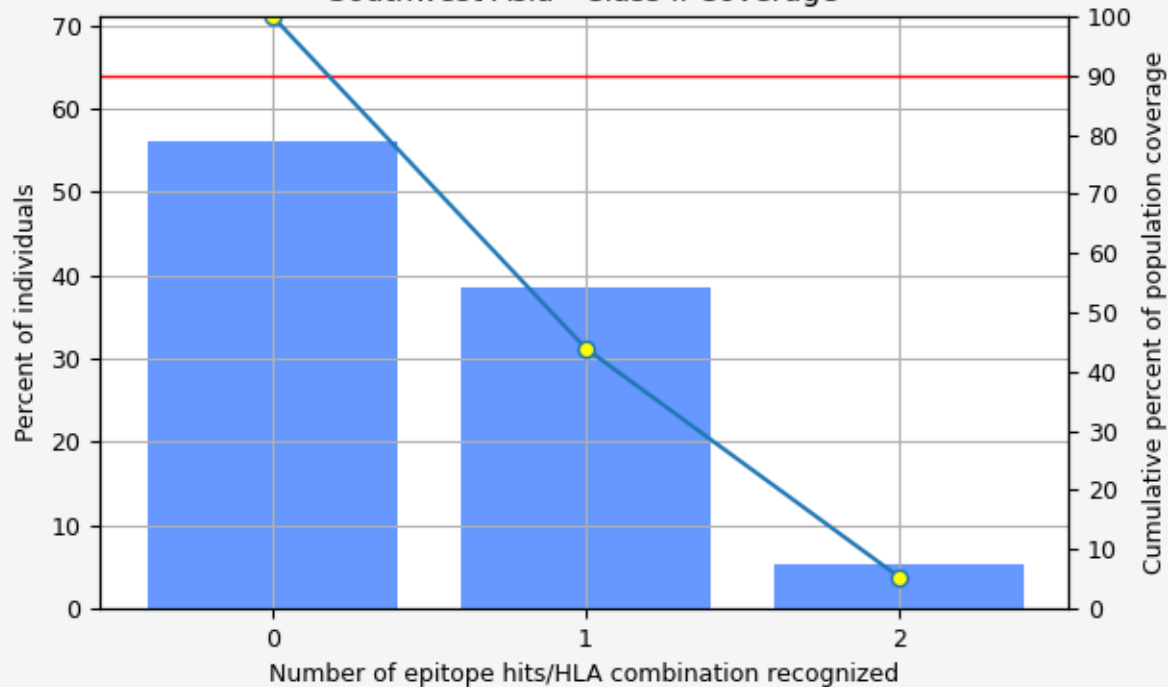

West Africa - Class II Coverage

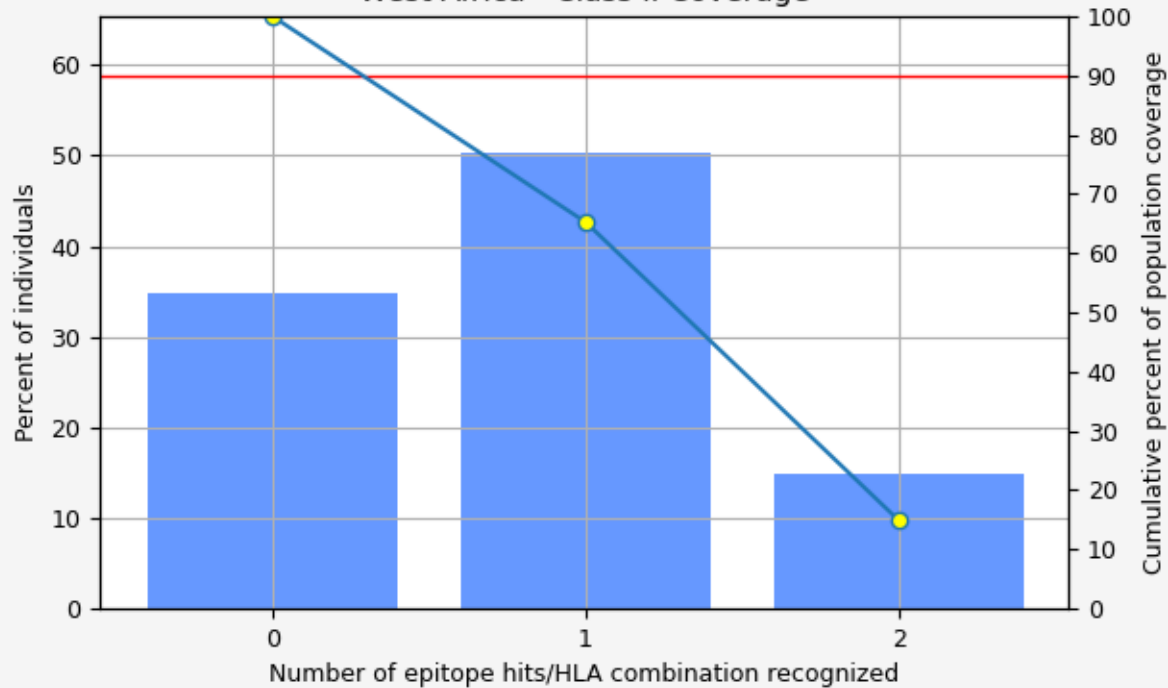



West Indies - Class II Coverage

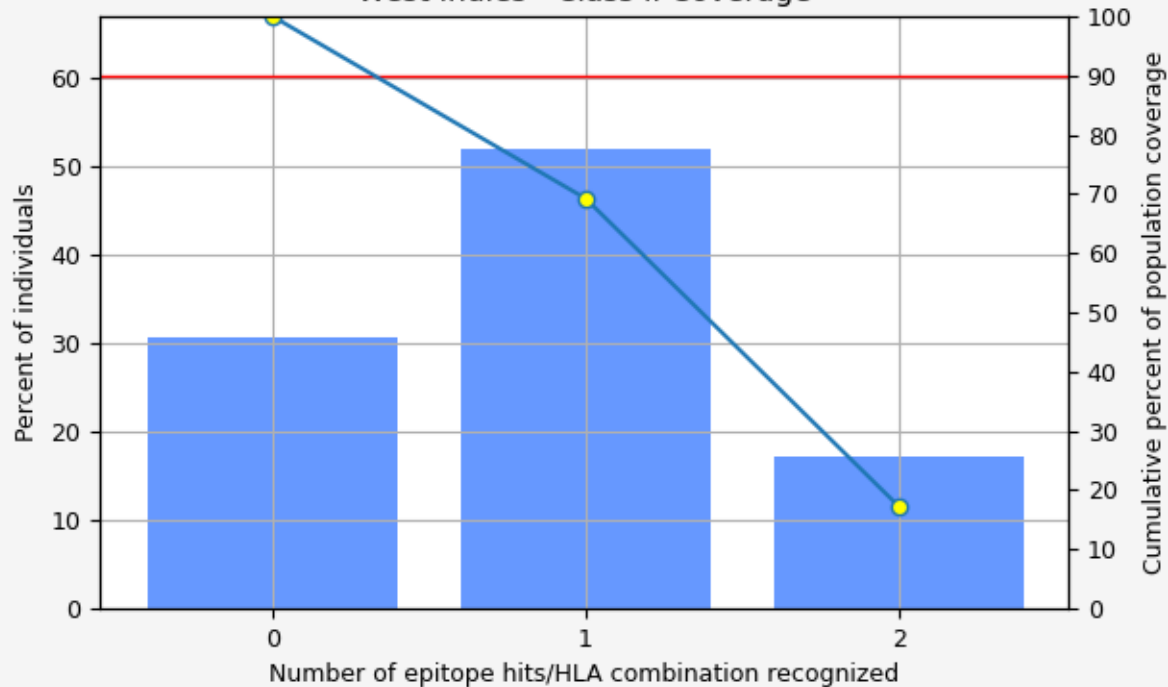

Supplement: s1 [file s1]
